# Supplementary material
Source: publisher figshare collection journal article supplement (https://geolsoc.figshare.com/ndownloader/files/14744603)
Supplement: Supplementary file 1 [file 14744603]

Appendix 1

## Dentition-based Character List

1. Premaxillary teeth (**Ordered**; Modified from Russell and Dong (1993) #2):

(0) present in the anterior and posterior portions of the premaxilla

(1) absent in the posterior portion of the premaxilla

(2) absent in the anterior portion of the premaxilla

(3) absent in the whole premaxilla, toothless premaxilla

2. Number of premaxillary teeth (or alveoli) (**Ordered**; Modified from Harris (1998) #47; Sereno et al. (1998) #19):

(0) 3 or less

(1) 4

(2) 5

(3) 6

(4) 7 or more

3. Premaxillary alveoli, direction of main axis of elongation in palatal view (Unordered; Hendrickx and Mateus (2014) #3):

(0) all alveoli mesio-distally oriented

(1) anterior alveoli labio-lingually oriented, posterior alveoli mesio-distally oriented

(2) all alveoli labio-lingually oriented

4. Premaxillary alveoli, overlap of the first and second alveoli in palatal view (**Ordered**; Hendrickx and Mateus (2014) #4):

(0) absent

(1) present, partial

(2) present, almost complete

5. Premaxillary alveoli, overlap of the second and third alveoli in palatal view (Hendrickx and Mateus (2014) #5):

(0) absent

(1) present

6. Premaxillary alveoli, overlap of the third and fourth alveoli in palatal view (Hendrickx and Mateus (2014) #6):

(0) absent

(1) present

7. Premaxillary teeth (or alveoli), size (Unordered; Modified from Holtz et al. (2004) #261):

(0) all approximately equal in size

(1) posterior teeth (or alveoli) smaller than anterior teeth (or alveoli)

(2) anterior teeth (or alveoli) smaller than posterior teeth (or alveoli)

8. Anterior premaxillary teeth (or alveoli), size (Unordered; Hendrickx and Mateus (2014) #8):

(0) significantly smaller than the first six anterior maxillary teeth (or alveoli)

(1) subequal in size than the first six anterior maxillary teeth (or alveoli)

(2) significantly larger than the first six anterior maxillary teeth (or alveoli)

9. Posterior premaxillary teeth (or alveoli), size (Modified from Holtz (2001) #15):

(0) significantly smaller than the first six anterior maxillary teeth (or alveoli)

(1) subequal in size than the first six anterior maxillary teeth (or alveoli)

(2) significantly larger than the first six anterior maxillary teeth (or alveoli)

10. First premaxillary tooth (or alveolus), size (Unordered; Modified from Sereno et al. (1998) #38):

(0) subequal in size than second tooth (or alveolus)

(1) significantly smaller than second tooth (or alveolus)

(2) significantly bigger than second tooth (or alveolus)

11. Second premaxillary tooth (or alveolus), size (Unordered; Modified from Currie (1995) #4):

(0) subequal in size than third (and fourth) premaxillary tooth (or alveolus)

(1) significantly smaller than third (and fourth) tooth (or alveolus)

(2) significantly larger than third (and fourth) tooth (or alveolus)

12. Posteriormost premaxillary tooth (or alveolus), mesiodistal length in palatal view (Unordered; Hendrickx and Mateus (2014) #12):

(0) subequal in size than more anterior teeth (or alveoli)

(1) significantly smaller than more anterior teeth (or alveoli)

(2) significantly larger than anterior teeth (or alveoli)

13. Distal premaxillary alveoli, shape in palatal view (Hendrickx and Mateus (2014) #13):

(0) oval to subcircular

(1) subrectangular

14. Premaxillary tooth row, posterior extension (position of posteriormost premaxillary tooth): (Modified from Sereno (1999) #36):

(0) aligned (ventral) to external naris

(1) anterior to external naris

15. Premaxilla in palatal view (**Ordered**; Hendrickx and Mateus (2014) #16):

(0) unconstricted

(1) slightly constricted

(2) strongly constricted, terminal rosette of premaxilla

16. Subnarial gap/diastema (i.e., posterior part of premaxillary alveolar margin edentulous, resulting in an interruption of the upper tooth row) (Modified from Gauthier (1986) #36; Sereno (1999) #34; Welles (1984); Rowe 1989; Rowe and Gauthier 1990):

(0) absent

(1) present and short, diastema not extensive enough to host more than one tooth

(2) present and long, diastema extensive enough to host more than one tooth

17. First premaxillary alveoli open (**New**):

(0) ventrally, decumbent teeth

(1) anteroventrally, procumbent teeth

18. Maxillary teeth (**Ordered**; Modified from Holtz (1998b) #56):

(0) present in the anterior and posterior portions of the maxilla (posteriormost portion excluded)

(1) absent in the anteriormost portions of the maxilla

(2) absent in the posterior portion of the maxilla (i.e., more than one fourth of the bone edentulous)

(3) absent in the whole maxilla, toothless maxilla

19. Number of maxillary teeth (or alveoli) (**Ordered**; Modified from Carrano et al. (2002) #58):

(0) >19

(1) 18-19

(2) 16-17

(3) 15

(4) 10-14

(5) 1-9

20. Anterior maxillary teeth (or alveoli), size (Unordered; Modified from Zanno et al. (2009) #340):

(0) subequal in size than posterior teeth (or alveoli)

(1) significantly larger than posterior maxillary teeth (or alveoli)

(2) significantly smaller than posterior maxillary teeth (or alveoli)

21. Mid-maxillary teeth (or alveoli), mesiodistal length (Unordered; Hendrickx and Mateus (2014) #19):

(0) subequal in size than anteriormost maxillary teeth (or alveoli)

(1) significantly larger than anteriormost maxillary teeth (or alveoli)

(2) significantly smaller than anteriormost maxillary teeth (or alveoli)

22. First maxillary tooth (or alveolus), size (Modified from Sereno et al. (1998) #38):

(0) significantly smaller than second tooth (or alveolus)

(1) subequal in size than second tooth (or alveolus)

23. First maxillary teeth (or alveoli) open (Tykoski (2005) #26; Rowe 1989):

(0) ventrally, decumbent teeth

(1) anteroventrally, procumbent teeth

24. Mid-maxillary teeth, inclination (Unordered; Hendrickx and Mateus (2014) #22):

(0) pointing ventrally (decumbent)

(1) pointing lateroventrally (laterocumbent)

(2) pointing anteroventrally (procumbent)

(3) pointing posteroventrally (retrocumbent)

25. Maxillary alveoli, shape in palatal view (Unordered; Hendrickx and Mateus (2014) #23):

(0) oval to lenticular

(1) subrectangular

(2) circular

(3) merged to form an open alveolar groove (interdental septa absent)

26. Maxillary tooth row, posterior extension (position of posteriormost tooth) (**Ordered**; Modified from Gauthier (1986) #38; Harris (1998) #3; Holtz (1998b) #133; Rauhut (2003) #70):

(0) posterior to the anteriormost rim of orbit

(1) anterior or aligned to the anteriormost rim of orbit, posterior to the posteriormost rim of antorbital fenestra

(2) anterior or aligned to the posteriormost rim of antorbital fenestra, posterior to the anteriormost rim of antorbital fenestra

(3) aligned to the anteriormost rim of antorbital fenestra

(4) anterior to the anteriormost rim of the antorbital fenestra

27. Dentary teeth (**Ordered**; Modified from Sereno (1999) #175):

(0) present in the anterior and posterior portions of the dentary

(1) absent in the anteriormost portion of the dentary

(2) absent in the posterior portion of the dentary (more than one fourth of the bone edentulous)

(3) absent in the whole dentary, toothless dentary

28. Number of dentary teeth (or alveoli) (**Ordered**; Modified from Norell et al. (2001b) #86; Carrano et al. (2002) #59):

(0) > 25

(1) 18-25

(2) 15-17

(3) < 15

29. Dentary alveoli in dorsal view (Chiappe et al. (1996) #92; Currie 1987):

(0) in separate alveoli

(1) merged to form an open alveolar groove (interdental septa absent)

30. Anteriormost dentary teeth (or alveoli), size (Unordered; Modified from Rauhut (2003) #83; Tykoski (2005) #101):

(0) subequal in size than mid- and posterior dentary teeth (or alveoli)

(1) significantly larger than mid- and posterior dentary teeth (or alveoli)

(2) significantly smaller than mid- and posterior dentary teeth (or alveoli)

31. First dentary tooth (or alveolus), size in comparison to second and third dentary alveoli (Unordered; Modified from Gauthier (1986) #36 and Harris (1998) #48. Based on Holtz et al. (2004) #213 and Sereno et al. (2004) #71):

(0) subequal in size

(1) first tooth (or alveolus) substantially smaller

(2) first tooth (or alveolus) substantially larger

32. Mid-dentary teeth (or alveoli), size (Unordered; Modified from Pérez-Moreno et al. (1994) #3):

(0) subequal in size than anterior maxillary teeth (or alveoli)

(1) significantly smaller than anterior maxillary teeth (or alveoli)

(2) significantly larger than anterior maxillary teeth (or alveoli)

33. Terminal rosette of dentary, number of teeth (or alveoli) (Unordered; Hendrickx and Mateus (2014) #31):

(0) terminal rosette absent

(1) four teeth (or alveoli)

(2) five teeth (or alveoli)

34. First two or three dentary alveoli open (Hendrickx and Mateus (2014) #32):

(0) dorsally, decumbent teeth

(1) anterodorsally, procumbent teeth

35. Mid-dentary teeth, inclination (**New**):

(0) pointing dorsally, decumbent

(1) pointing anterodorsally, procumbent

36. Dentary teeth, spacing (Norell et al. (2001b) #90):

(0) evenly spaced

(1) anterior dentary teeth more closely appressed than those in middle and posterior parts of the tooth row

37. Palatal teeth on the pterygoid (Sereno (1999) #107):

(0) present

(1) absent

38. Mesial teeth, constriction between root and crown (**Ordered**; Modified from Pérez-Moreno et al. (1994) #4; Martin et al. 1980):

(0) absent

(1) constriction weak, base of crown occupying more than 85% of largest crown width

(2) constriction important, base of crown occupying 85% or less of largest crown width

39. Mesial teeth, constriction between root and crown along the tooth row (Hendrickx and Mateus (2014) #35):

(0) present in some teeth

(1) present in all teeth

40. Mesial teeth, height of the largest crown (CH in centimeters) in subadults/adults (**Ordered**; Modified from Hendrickx and Mateus (2014) #36):

(0) CH ≤ 1

(1) 1 < CH ≤ 6

(2) CH > 6

41. Mesial teeth, labiolingual compression of the crown (CBR = CBW/CBL) (Unordered; Modified from Sereno et al. (1998) #17; Charig and Milner 1997):

(0) CBR < 0.5, lenticular and strongly labiolingually compressed

(1) 0.5<CBR ≤ 0.75, oval to lenticular

(2) weak, 0.75 < CBR < 1.2, tooth subcircular

(3) CBR ≥ 1.2, teeth labiolingually elongated

42. Mesial teeth, baso-apical elongation of the crown (CHR = CH/CBL) (Unordered; Hendrickx and Mateus (2014) #38):

(0) strongly elongated, CHR > 3

(1) important, 2.5 < CHR ≤ 3

(2) normal, 2 < CHR ≤ 2.5

(3) weak, CHR ≤ 2

43. Mesial teeth, crown recurvature (lingually or distally) (Unordered; Modified from Sereno et al. (1998) #35):

(0) present, strongly recurved

(1) present, slightly recurved

(2) absent, tooth crown straight and apex centrally positioned or almost centrally positioned

44. Mesial teeth, distal margin of the crown in lateral view (Unordered; Modified from Canale et al. (2009) #5; Smith 2007):

(0) mainly concave

(1) straight

(2) mainly convex

45. Mesial teeth, outline of basal cross-section of the crown in the mesialmost tooth (Unordered; Modified from Bakker et al. (1988) #1):

(0) subcircular, ovoid or elliptical

(1) lanceolate, with acute and well-developed distal carina

(2) Salinon shape, with labial margin convex and lingual margin biconcave

(3) D-shaped or J-shaped, with lingual margins strongly convex and labial margin convex or sigmoid

(4) U-shaped, with mesial and distal margin subparallel; lenticular, with acute and well-developed distal and mesial carinae

46. Mesial teeth, concave surface adjacent to the carina (Unordered; Hendrickx and Mateus (2014) #42):

(0) absent

(1) on the labial surface and adjacent to the distal carina

(2) on the lingual surface and adjacent to both carinae

(3) on the lingual surface and adjacent to the mesial carina only

(4) on the lingual surface and adjacent to the distal carina only; one main concave surface centrally positioned on the lingual side of the crown

47. Mesial teeth, mesial carina (Hendrickx and Mateus (2014) #43):

(0) absent

(1) present

48. Mesial teeth, mesial carina (Modified from Senter et al. (2004) #20):

(0) non-serrated

(1) serrated

49. Mesial teeth, distal carina (Hendrickx and Mateus (2014) #45):

(0) serrated

(1) non-serrated

50. Mesial teeth, mesial carina (**Ordered**; Modified from Hendrickx and Mateus (2014a) #46):

(0) straight and centrally positioned on the crown

(1) slightly twisted, curves onto the mesiolingual surface

(2) strongly twisted, curves onto the lingual surface

(3) almost straight and strongly lingually deflected

51. Mesial teeth, mesial carina, and if serrated, mesial serration (Unordered; Modified from Benson (2010) #89):

(0) terminates well-above the cervix

(1) extends to the cervix or just above it

(2) terminates well beneath the cervix

52. Mesial teeth, distal carina (Modified from Hendrickx and Mateus (2014) #48):

(0) centrally positioned or slightly displaced

(1) strongly labially deflected

53. Mesial teeth, position of mesial carina on the crown in articulation in mesialmost teeth (Unordered; Modified from Currie (1995) #2 and Hendrickx and Mateus (2014) #47):

(0) facing mostly labially

(1) facing mostly mesially

(2) facing mostly lingually

54. Mesial teeth, position of distal carina on the crown in articulation in mesialmost teeth (Modified from Hendrickx and Mateus (2014) #48):

(0) facing mostly distally or labiodistally

(1) facing mostly lingually

55. Mesial teeth, average number of denticles per five millimeters on mesial carina at two-thirds height of crown (MCA) in subadults/adults (Unordered; Modified from Russell and Dong (1993) #20):

(0) ≥ 20 (1) 14-19

(2) 9-13

(3) ≤ 8

56. Mesial teeth, average number of mid-crown denticles per five millimeters on distal carina (DC) in subadults/adults (Unordered; Modified from Russell and Dong (1993) #20):

(0) ≥ 20

(1) 14-19

(2) 9-13

(3) ≤ 8

57. Mesial teeth, denticle size (except in embryos and hatchlings) (**Ordered**; Hendrickx and Mateus (2014) #53):

(0) minute denticles, more than 250 denticles on the distal carina

(1) normal in height, between 15 to 250 denticles on the distal carina

(2) very larges denticles, fewer than 15 denticles on the distal carina

58. Mesial teeth, denticles on mesial carina (Unordered; Modified from Norell et al. (2001b) #88):

(0) rounded and symmetrically convex

(1) rounded and asymmetrically convex

(2) strongly hooked/pointed, denticles with a tip pointing apically

59. Mesial teeth, denticles on distal carina (Unordered; Modified from Senter et al. (2004) #23):

(0) rounded and symmetrically convex

(1) rounded and asymmetrically convex

(2) strongly hooked/pointed, denticles with a tip pointing apically

60. Mesial teeth, size of mesial denticles relative to distal denticles (DSDI) (Unordered; Modified from Holtz (1998b) #129; Rauhut and Werner 1995):

(0) mesial and distal denticles of same size, 0.8 < DSDI <1.2

(1) mesial denticles larger than distal ones, DSDI < 0.8

(2) distal denticles larger than mesial ones, DSDI > 1.2

61. Mesial teeth, denticles contiguous over tip or very close to the apex (Modified from Harris (1998) #45):

(0) present

(1) absent

62. Mesial teeth, interdenticular sulci (Unordered; Modified from Benson (2010) #90):

(0) absent

(1) present, short

(2) present, long and well-developed

63. Mesial teeth, flutes (i.e., subparallel longitudinal grooves separated by acute ridges) on the crown (Unordered; Modified from Sereno et al. (1998) #18; Charig and Milner 1997):

(0) absent

(1) present on the lingual surface only

(2) present on both labial and lingual surfaces

(3) present on the labial surface only

64. Mesial teeth, longitudinal groove on the labial and/or lingual side of the crown (Unordered; Hendrickx and Mateus (2014) #60):

(0) absent

(1) present, a single groove centrally positioned

(2) present, a single groove mesially positioned

65. Mesial teeth, longitudinal ridge (differing from flutes) on the lingual side of the crown (Unordered; Hendrickx and Mateus (2014) #61):

(0) absent

(1) present, a single ridge centrally positioned

66. Mesial teeth, basal striations on both lingual and labial sides of the crown (Hendrickx and Mateus (2014) #62):

(0) absent

(1) present

67. Lateral teeth, constriction between root and crown (**Ordered**; Pérez-Moreno et al. (1994) #4; Martin et al. 1980):

(0) absent

(1) constriction weak, crown base occupying more than 85% of largest crown width mesiodistally

(2) constriction important, crown base occupying 85% or less of largest crown width mesiodistally

68. Lateral teeth, constriction between root and crown along the tooth row (Hendrickx and Mateus (2014) #64):

(0) present in some teeth

(1) present in all teeth

69. Lateral teeth, height of the largest crown (CH in centimeters) in subadults/adults (**Ordered**; Hendrickx and Mateus (2014) #65):

(0) CH ≤ 1

(1) 1 < CH ≤ 6

(2) CH > 6

70. Lateral teeth, labiolingual compression of the crown (CBR = CBW/CBL) (Unordered; Hendrickx and Mateus (2014) #66):

(0) important, CBR ≤ 0.5, tooth strongly flattened

(1) normal, 0.5 < CBR ≤ 0.75

(2) weak, CBR > 0.75, tooth incrassate or subcircular

71. Lateral teeth, baso-apical elongation of the crown (CHR = CH/CBL) (Unordered; Hendrickx and Mateus (2014) #67):

(0) weak, CHR ≤ 1.5

(1) normal, 1.5 < CHR ≤ 2.5

(2) important, CHR > 2.5

72. Lateral teeth, distal margin of crown in lateral view (Unordered; Modified from Hendrickx and Mateus (2014) #68):

(0) strongly concave

(1) slightly concave, roughly straight, or straight, apex positioned at the same level as distal profile

(2) convex, apex positioned mesial to distal profile

(3) sigmoid, basal half concave and apical half convex

(4) sigmoid, basal half convex and apical half concave

73. Lateral teeth, mesial margin of crown in lateral view (Modified from Hendrickx and Mateus (2014) #69):

(0) strongly convex

(1) slightly convex, almost straight

74. Lateral teeth, mesiodistal curvature of the labial surface of the crown at one third of the crown (Unordered; Modified from Hendrickx and Mateus (2014) #70 and #73; Peyer 2006):

(0) convex

(1) surface centrally positioned on the crown roughly flattened

(2) surface centrally positioned on the crown concave, labial depression restricted to the crown base

(3) surface centrally positioned on the crown concave, labial depression extends along the basal half of the crown or more apically

75. Lateral teeth, concave surface adjacent to carinae all along the crown (Unordered; Hendrickx and Mateus (2014) #71):

(0) absent

(1) present on labial surface and adjacent to distal carina

(2) present on lingual surface and adjacent to distal carina

(3) present on labial surface and adjacent to both mesial and distal carinae

(4) present on lingual surface and adjacent to both mesial and distal carinae

76. Lateral teeth, outline of basal cross-section of the crown (Unordered; Hendrickx and Mateus (2014) #72):

(0) subcircular

(1) lenticular or lanceolate

(2) elliptical or bean-shaped (i.e., longitudinal depression centrally positioned on one side only)

(3) 8-shaped (i.e., longitudinal depression centrally positioned on both lingual and labial margins)

(4) Subrectangular

77. Lateral teeth, mesial carina (Hendrickx and Mateus (2014) #74):

(0) present

(1) absent

78. Lateral teeth, mesial carina (Modified from Senter et al. (2004) #20):

(0) serrated

(1) non-serrated

79. Lateral teeth, distal carina (Hendrickx and Mateus (2014) #77):

(0) present

(1) absent

80. Lateral teeth, distal carina (Hendrickx and Mateus (2014) #78):

(0) serrated

(1) non-serrated

81. Lateral teeth, extension of mesial carina relative to distal carina (Hendrickx and Mateus (2014) #79):

(0) mesial carina extends at the same level or terminates more apically than the distal carina

(1) mesial carina extends more basally than the distal carina

82. Lateral teeth, mesial carina, and if serrated, basalmost serration of the mesial carina (Unordered; Modified from Benson (2010) #89):

(0) terminates around mid-height of crown or more apically

(1) extends to base of crown or slightly above the cervix

(2) terminates well beneath the cervix

83. Lateral teeth, twisted mesial carina in some crowns (Modified from Currie (1995) #2):

(0) absent, mesial carina centrally positioned on mesial margin or weakly curved lingually towards the base in all teeth

(1) present, mesial carina strongly twisting onto the mesiolingual surface in some teeth

84. Lateral teeth, distal carina, and if serrated, basalmost serration of the distal carina (Unordered; Modified from Benson (2010) #89):

(0) extends to the cervix or just above it

(1) terminates well beneath the cervix

(2) terminates well above the cervix

85. Lateral teeth, profile of the distal carina on the crown in distal view (Hendrickx and Mateus (2014) #82):

(0) straight or very slightly bowed

(1) strongly bowed or sigmoid

86. Lateral teeth, position of distal carina on the crown in distal view (Hendrickx and Mateus (2014) #83):

(0) centrally positioned or slightly displaced, crown subsymmetrical

(1) strongly labially deflected, crown asymmetrical

87. Lateral teeth, average number of denticles per five millimeters on mesial carina at two-thirds height of crown (MCA) in subadults/adults (Unordered; Modified from Russell and Dong (1993) #20):

(0) ≥ 30

(1) 16-29

(2) 9-15

(3) ≤ 8

88. Lateral teeth, average number of mid-crown denticles per five millimeters on distal carina (DC) in subadults/adults (Unordered; Modified from Russell and Dong (1993) #20):

(0) ≥ 30

(1) 16-29

(2) 9-15

(3) ≤ 8

89. Lateral teeth, denticle number on both mesial and distal carinae (except in embryos and hatchlings) (**Ordered**; Hendrickx and Mateus (2014) #86):

(0) more than 250 denticles (minute denticles or very large number of denticles of normal size)

(1) between 15 to 250 denticles (denticles of average size)

(2) fewer than 15 denticles (very large denticles or very small number of small denticles)

90. Lateral teeth, shape of denticles on mesial carina in lateral view (Unordered; Modified from Norell et al. (2001b) #88):

(0) symmetrically convex

(1) asymmetrically convex

(2) hooked/pointed

91. Lateral teeth, shape of denticles on distal carina in lateral view (Unordered; Senter et al. (2004) #23):

(0) symmetrically convex

(1) asymmetrically convex

(2) hooked/pointed

92. Lateral teeth, shape of mesial margin of rounded denticles on mesial carina in lateral view (Hendrickx and Mateus (2014) #89):

(0) parabolic

(1) subrectangular, with flattened surface

93. Lateral teeth, shape of distal margin of rounded denticles on distal carina in lateral view (Unordered; Hendrickx and Mateus (2014) #90):

(0) parabolic

(1) subrectangular, with flattened surface

(2) semi-circular

94. Lateral teeth, shape of denticles at two-thirds height of crown (MC-MA) on mesial carina in lateral view (Unordered; Hendrickx and Mateus (2014) #91):

(0) longer apicobasally than mesiodistally, vertical subrectangular

(1) as long mediodistally as apicobasally, subquadrangular

(2) longer mediodistally than apicobasally, horizontal subrectangular

95. Lateral teeth, shape of mid-crown denticles (DC) on distal carina in lateral view (Unordered; Hendrickx and Mateus (2014) #92):

(0) as long mediodistally as apicobasally, subquadrangular

(1) longer mediodistally than apicobasally, horizontal subrectangular

(2) longer apicobasally than mesiodistally, vertical subrectangular

96. Lateral teeth, denticle size along the carinae (Hendrickx and Mateus (2014) #93; Mateus et al. 2011):

(0) regular, gradual change in denticle size

(1) irregular, sporadic change in denticle size

97. Lateral teeth, biconvex apical denticles (i.e., biconvex external margin of denticle) on mesial carina in lateral view (Hendrickx and Mateus (2014) #94):

(0) absent

(1) present

98. Lateral teeth, orientation of mesiodistal axis of apical denticles on mesial carina in lateral view (Hendrickx and Mateus (2014) #95):

(0) perpendicular to mesial margin

(1) inclined apically from mesial margin

99. Lateral teeth, orientation of mesiodistal axis of mid-crown denticles on distal carina in lateral view (Hendrickx and Mateus (2014) #96):

(0) perpendicular to distal margin

(1) inclined apically from distal margin

100. Lateral teeth, average number of denticles on mesial carina (Unordered; Hendrickx and Mateus (2014) #97):

(0) higher number of denticles basally than at the mid-crown

(1) lower number of denticles basally than at the mid-crown

(2) subequal number of denticles basally than at the mid-crown

101. Lateral teeth, average number of denticles on mesial carina (Unordered; Hendrickx and Mateus (2014) #98):

(0) higher number of denticles apically than at the mid-crown

(1) lower number of denticles apically than at the mid-crown

(2) subequal number of denticles apically than at the mid-crown

102. Lateral teeth, average number of denticles on distal carina (except in embryos and hatchlings) (Hendrickx and Mateus (2014) #99):

(0) higher number of denticles basally than at the mid-crown

(1) subequal or lower number of denticles basally than at the mid-crown

103. Lateral teeth, average number of denticles on distal carina (Unordered; Hendrickx and Mateus (2014) #100):

(0) higher number of denticles apically than at the mid-crown

(1) lower number of denticles apically than at the mid-crown

(2) subequal number of denticles apically than at the mid-crown

104. Lateral teeth, size of mesial denticles relative to distal denticles (DSDI) (Unordered; Rauhut and Werner 1995):

(0) mesial and distal denticles of same size, 0.8 < DSDI <1.2

(1) mesial denticles larger than distal ones, DSDI < 0.8

(2) distal denticles larger than mesial ones, DSDI > 1.2

105. Lateral teeth, distal denticles on the apex (Harris (1998) #45):

(0) contiguous over tip, or very close to the apex

(1) distal denticles disappear well beneath apex

106. Lateral teeth, interdenticular space between mid-crown denticles on the distal carina (Hendrickx and Mateus (2014) #103):

(0) narrow, less than one third of the denticle width

(1) broad, more than one third of the denticle width

107. Lateral teeth, interdenticular sulci between apical denticles on the mesial carina (Unordered; Modified from Benson (2010) #90):

(0) absent

(1) present, short and poorly developed, shorter than proximodistal denticle height

(2) present, long and well-developed, equal or longer than proximodistal denticle height

108. Lateral teeth, interdenticular sulci between mid-crown denticles on the distal carina (Unordered; Modified from Benson (2010) #90):

(0) absent

(1) present, short and poorly developed, shorter than proximodistal denticle height

(2) present, long and well-developed, equal or longer than proximodistal denticle height

109. Lateral teeth, interdenticular sulci between basalmost denticles on the distal carina (Unordered; Modified from Benson (2010) #90):

(0) absent

(1) present, short and poorly developed, shorter than proximodistal denticle height

(2) present, long and well-developed, equal or longer than proximodistal denticle height

110. Lateral teeth, flutes (i.e., subparallel longitudinal grooves separated by acute ridges) on the crown (Unordered; Modified from Sereno et al. (1998) #18; Bakker et al. (1988) #2):

(0) absent

(1) present on the lingual surface

(2) present on labial surface or both labial and lingual surfaces

111. Lateral teeth, average number of flutes on the crown (Unordered; Modified from Hendrickx and Mateus (2014) #108):

(0) 1-7

(1) 7-8

(2) >8

112. Lateral teeth, large transversal undulations on the crown in some teeth (Unordered; Modified from Holtz (1998b) #131):

(0) absent

(1) present, tenuous and barely visible with light

(2) present, pronounced and well visible with light

113. Lateral teeth, large transversal undulations on the crown in some teeth when present (Hendrickx and Mateus (2014) #110):

(0) just a few

(1) numerous and closely packed

114. Lateral teeth, marginal undulations (i.e., short undulations adjacent to carinae) in some teeth (Unordered; Modified from Currie and Carpenter (2000) #42; Brusatte et al. 2007):

(0) absent

(1) present and short, the mesiodistal elongation is less than four times the space separating each undulation

(2) present and elongated, the mesiodistal elongation is longer than four times the space separating each undulation

115. Lateral teeth, marginal undulations in some teeth (Hendrickx and Mateus (2014) #112):

(0) present and shallow, only visible with light

(1) present and pronounced, well visible in lateral view

116. Lateral teeth, marginal undulations in some teeth (Unordered; Hendrickx and Mateus (2014) #113):

(0) present only on the mesial side of the crown

(1) present only on the distal side of the crown

(2) present on both mesial and distal sides

117. Lateral teeth, marginal undulations in some teeth (Hendrickx and Mateus (2014) #114):

(0) present and mesio-distally oriented

(1) present and diagonally oriented

118. Lateral teeth, longitudinal groove on the labial and/or lingual surface of the crown (Unordered; Hendrickx and Mateus (2014) #115):

(0) absent

(1) present, a single groove centrally positioned

(2) present, a single groove adjacent to mesial carina

(3) present, two grooves or more

119. Lateral teeth, elongated longitudinal and rounded ridge (differing from flutes) on the lingual surface of the crown (Unordered; Hendrickx and Mateus (2014) #116):

(0) absent

(1) present, a single ridge centrally positioned

(2) present, two or three ridges

(3) present, several fainted ridges

120. Enamel surface texture (Unordered; Hendrickx and Mateus (2014) #117):

(0) smooth or irregular (non-oriented) texture

(1) braided (oriented) texture not clearly visible with light

(2) braided (oriented) texture clearly visible with or without light

(3) deeply veined/anastomosed (oriented) texture

121. Coarse enamel surface texture (Hendrickx and Mateus (2014) #118):

(0) remains baso-apically/diagonally oriented or slightly curved basally close to the carinae

(1) strongly curved basally close to the carinae

122. Enamel microstructure, enamel tubules (Unordered; Hwang (2007) #12):

(0) absent or rare

(1) common only in basal unit layer (BUL) and/or inner potion of enamel

(2) common and extend throughout entire enamel thickness

(3) extremely common and forming an integral structural component of enamel

123. Enamel microstructure, predominant enamel type (Unordered; Modified from Hwang (2007) #13; character state 2 removed):

(0) parallel crystallites

(1) basal unit layer (BUL)

(2) columnar

124. Enamel microstructure, predominant enamel type, percentage of enamel thickness (Hwang (2007) #14):

(0) ≥ 75%

(1) < 75%

125. Enamel microstructure, number of enamel types present in schmelzmuster (Hwang (2007) #15):

(0) one

(1) two

(2) three

(3) four

126. Enamel microstructure, number of different module types present in schmelzmuster (Hwang (2007) #16):

(0) one

(1) two

127. Enamel microstructure, boundary between first and second enamel types from the enamel-dentine junction (EDJ; Hwang (2007) #17):

(0) parallel to EDJ

(1) jagged, varies in distance from EDJ

128. Enamel microstructure, boundary between second and third enamel types from the enamel-dentine junction (EDJ; Hwang (2007) #18):

(0) parallel to EDJ

(1) jagged, varies in distance from EDJ

129. Enamel microstructure, basal unit layer (BUL; Hwang (2007) #19):

(0) present

(1) absent

130. Enamel microstructure, basal unit layer (BUL; Hwang (2007) #20):

(0) poorly developed

(1) well-developed, with distinct planes of separation between adjacent units

131. Enamel microstructure, basal unit layer (BUL), maximum unit diameter (Hwang (2007) #21):

(0) < 10 µm

(1) ≥ 10 µm

132. Enamel microstructure, basal unit layer (BUL; Unordered; Hwang (2007) #22):

(0) < 25% of total enamel thickness

(1) 25-50% of total enamel thickness

(2) ≥ 50% of enamel thickness

133. Enamel microstructure, incremental lines (Unordered; Hwang (2007) #23):

(0) absent

(1) faint, poorly defined

(2) well-defined

134. Enamel microstructure, incremental lines (Unordered; Hwang (2007) #24):

(0) present in one section of the schmelzmuster only

(1) present in more than one section of the schmelzmuster but not throughout entire schmelzmuster

(2) present throughout entire schmelzmuster

135. Enamel microstructure, columnar units closest to the enamel-dentine junction (EDJ), shape of units in cross-sections (Unordered; Hwang (2007) #27):

(0) polygons with sharp corners and more than 4 sides

(1) subcircular or polygons with rounded corners and more than 4 sides

(2) triangles and/or rectangles with sharp corners

136. Enamel microstructure, columnar units closest to the enamel-dentine junction (EDJ; Hwang (2007) #28):

(0) extend straight and unbroken to the outer enamel surface (OES) or to within 20µm below the OES

(1) end, split, or are interrupted less than two-thirds of the distance from the EDJ to OES

137. Enamel microstructure, columnar units closest to the enamel-dentine junction (EDJ), maximum unit diameter (Hwang (2007) #29):

(0) < 15µm

(1) ≥ 15µm

138. Enamel microstructure, columnar units closest to the outer enamel surface (OES; Hwang (2007) #33):

(0) no dominant direction of orientation, planes of separations equally well-developed in all directions

(1) distinct longitudinal orientation, planes of separation better developed in an apicobasal (longitudinal) direction

139. Enamel microstructure, ratio of thickest enamel type in schmelzmuster divided by second thickest enamel type (Unordered; Hwang (2007) #39):

(0) > 7

(1) 1.3 to 7

(2) 1 to 1.3

140. Root, shape in lateral view (Hendrickx and Mateus (2014) #137):

(0) with subparallel mesial and distal margins

(1) with convex margins, root significantly larger than crown base

141. Root, distal shape in lateral view (Sereno et al. (1998) #21; Charig and Milner 1997):

(0) broad

(1) strongly tapered

142. Root, outline of mid-root in cross section (Unordered; Hendrickx and Mateus (2014) #139):

(0) oval to subcircular

(1) 8-shape (i.e., longitudinal depression centrally positioned on both lingual and labial margins)

(2) bean-shaped (i.e., longitudinal depression centrally positioned on one side only)

143. Root, form of the resorption pit in lingual view (Hendrickx and Mateus (2014) #140):

(0) deep and well-delimited depression

(1) shallow concavity

144. Root, transversal undulations below the cervix in some crowns (Hendrickx and Mateus (2014) #141):

(0) absent

(1) present

145. Root, apicobasal length in lateral view (**New**):

(0) less than twice the apicobasal length of the crown

(1) twice or more the apicobasal length of the crown

## Phylogenetic Character Dataset

### Files

The Excel, Mesquite and TNT files are downloadable at <https://drive.google.com/drive/folders/1BgC97GEJQs6mI6Tf8OIUFZdolKHe6LsR?usp=sharing> and can be obtained by request to Christophe Hendrickx ([christophendrickx@gmail.com](mailto:christophendrickx@gmail.com)).

### Dentition-based data matrix

xread

145 103

Herrerasaurus 01000000000000000011000000020001000010-11[2 3]10000-0--1-0-01-0-?000010-1[0 1 2][0 1][0 1]000[0 2]00000?0000111000[0 1]100000-???0?10000-200---000-????????????????????????

Daemonosaurus 00?000110021?00110412000?00?01010100?0-1?[2 3]000011000010??110?0000000-1?[1 2]0000?0000000000??11000010?000000?0?0000-0-0---000-??????????????????00????

Eodromaeus 01???????????000?0410?000?030??100000?????????????????????????????0-0[0 1]200011[0 1]000010000001[0 1]000[0 1][0 1]000020000?00000-100---0010????????????????????????

Eoraptor 010100000000?00100110000?00?????????0100[1 2][1 2]100[0 1][0 1]10001101012[1 2]1100000[1 2]00[0 1][0 1]100[1 3]?0000000?001[0 1]1[1 2][1 2]00000001--001000000-0-0---000-????????????????????????

Dracovenator 0111100??10100200??????00???0????????0-1021010110000???21?020000000-10?00001000001010012100000100000?0?2?10000-100---0010??????????????????????0?

Coelophysis 010?000000000011000101100000010??00010-0[0 1][0 1 2]1000[0 1]1000110-01-0-0030000-1[0 1][0 1]000[1 3]100000[0 1]00??00100[0 1]0[0 1]00000-000000000[0 3]00-0---001000011--1---0------??????

Liliensternus ?????????????????0?????00?010010100010-01?1[0 1]0011000010001?00?000000-1[0 1]1[0 1]00010000000000[0 1][0 1]100[0 1]0[0 1][0 1]0?00-0000010000-0-0---000-??????????????????001?0?

Dilophosaurus 011100000101002200411110010201111000?0-11[0 1]0000110001??1[1 2]10020000000-11100[1 2][3 4]100000100001210000[0 1]100000?0?20?0000-0-0---0010??????????????????001000

Ceratosaurus 00111-000000000000[3 4]11100000[2 3]0011000010-1[1 2]3[0 1][0 1]0011000010[2 3][2 3]10020[0 1]10000-2[0 1]1[0 1 2]0[1 2][0 3 4]1000001000[0 1]22100[0 1]01[0 1 2]001[0 1]0[1 2]0[0 2]001[0 1][0 1 2][0 1 2]0-[1 2]01[0 1][0 1][0 1]001022021000110202000000?000

Genyodectes 011111000000000000??11000?0300110000?0-2[0 1][0 1 2]000011000000221000?000000-2[0 1]1[0 1]0[1 2][2 3 4]200000100[0 1]12210[0 1]0010001[0 1]-2020010[0 1]00-210---0010????????????????????????

Berberosaurus ??????????????????????????????????????????????????????????????????0-10100[1 2]230000010?01221[0 1][0 1]???1001?-1020?10000-200---0010????????????????????????

'Limusaurus_juvenile' [1 2]0------[1 2]---0000-[0 1]50100002[1 2]30001000010-0??[0 1]???0-1-------------00000-0??[0 1]0???1-1------------------------------0-0-0---00????????????????????0[0 1]???0

'Limusaurus_adult' 3----------------3--------3---------1------------------------------------------------------------------------------------------------------------

Noasaurus ?????????????????04101000?????????????????????????????????????????0-01[0 1]10001000001000001100000000000?1?2?00000-0-0---000-????????????????????????

Masiakasaurus 0?11???1?0???????0?10?000?0300000100?210[2 3][0 1]10231[0 1]02112000100[0 2]0010000-1[0 1][1 2]000010000010001[0 1][1 2]10[0 1 2][0 1]000000[0 1]000020000010[1 2]00---0010??????????????????001100

Kryptops ?????????????????0??0?001?????????????????????????????????????????0-1?110001000001000?121[0 1]2[0 1]0000001?0?000022?0-0-0---000-??????????????????0?????

Rugops 0100000?1?00100000?111001???????????????1???2?11?0?010????????????0-1[0 1]?[1 2]00010000010000[1 2]210200000001?0?000000?0-0-0---000-????????????????????????

Abelisaurus 01?000???????00000????00?????????????0-113[1 2][1 2]231100[1 2]0??2210[1 2]00200000-1[0 1][0 1]100010000010?00221[0 1][1 2]0010011100000000100-101010000-????????????????????????

Aucasaurus 01?000??1?00?000004101001?????????????????????????????????????????0-1[0 1][0 1]100010000010000221[0 1][1 2][0 1]01[0 1]011100?00000000-200---000-??????????????????0?0?1?

Indosuchus 0100000110001000004001001?0?0?100000?0-1[1 2]3[1 2][1 2][2 3][2 3]110[0 1][1 2]010[2 3][2 3]1??0?000000-1[0 1]?[1 2]000100000100?0221??????????0???0??0110-0-0---000-????????????????????????

Majungasaurus 010000011[0 1]001000002111001102021000001[0 1]01[1 2]3[1 2][1 2][2 3][2 3]110[0 1]2010[2 3][2 3]1[1 2]200200000-1[0 1][0 1][1 2]00010000010000[2 3]21[1 2]2000[0 1]000100000001220-201010000-22021000110102000000?1??

Skorpiovenator 01???????????00000110?00?10??????????0-11222?3110020??211???0000000-10[0 1][1 2]00010000010010221000011001[0 1]0?0?0?00000-0-2020000-??????????????????00?1?0

Chilesaurus 01???????????0?01?????02??0????00110?210?122?00-1-------------0000110?12000?11[0 1][0 1]---200?0??0?0?2?0?0??--?00?0-0-0-0---00????????????????????10??00

Piatnitzkysaurus ?????????????????01?00000?0?0???0000??????????????????????????????0-11[1 2]0010100000[0 1]1[0 1]10[1 2][1 2]10[0 1 2]0[0 2][0 1]1000020002000[1 2][1 2]0-[1 2]1201000[0 1]0??????????????????001100

Marshosaurus 0111100000000000002101000?0100110000?0-1121[0 1]10110000100110020100000-1[0 1][0 1]000010000000?0[0 1]1[1 2]101[0 1]00[0 1]000000002010100-[1 2][1 2]0---0010??????????????????00?1?0

Monolophosaurus 01??000?0?00?00000410?00?2010001000010-11[2 3][0 1]0101?000110?11?0??000000-1[0 1][0 1][0 1]00010000000[0 1]0[0 1][1 2][1 2]100[0 1][0 2]0[0 1]0000?0?00010000-1010110011??????????????????0??1??

Sciuruminus 01?100000000?0?000?11?0[0 3]?20300110100?0-0?[1 2][0 1]0??0-[0 1]--?-0-0?-?-100000100?100???1-00---0??-??-[1 2]-0-[0 2]0--0--00-[0 1]1-000-0-0---000-??????????????????1???0?

Eustreptospondylus 011110?0000?000000????000?0300111000???1??10?01100?00122100?0100000-11?000010000000???[2 3]2100[0 1]0000000-??00000??0-0-0---0010????????????????????????

Afrovenator ?????????????????041010002????????????????????????????????????????0-201000110000000110321[0 1][0 1][0 1]2010?00-0010001110-0-10000010??????????????????0?1?0?

Dubreuillosaurus 01111000000000000041010002030011000010-11210101100000[0 1]221000?000000-1[0 1][0 1]000010000000100111[0 1][0 1][0 1]0000000-0010000110-0-0---0010??????????????????000?00

Duriavenator 0?11???0?0??00??00?101000?0?00100000?0-?12??1?110??0?1[2 3]310000?00000-1[0 1]10000100000001??[2 3]210[0 1][0 1]00101[0 1]0-1010000110-[0 1]00---0010??????????????????00?100

Megalosaurus 0????????????????04101000?03001000001?????????????????????????????0-2[0 1]10000100000001[0 1]0[2 3][2 3]1[0 1][0 1][0 1][0 2]010100-1000001[1 2][1 2]0-2110[1 2][0 1]0020????????????????????????

Torvosaurus 00111-00000000000041010002030??100001??21???1011000000331???0?00000-2[0 1][1 2]0000100000[0 1]01[0 1]0[2 3][2 3]1[0 1][0 1][0 1]0110?00-10100[0 1]1220-2[0 1]10100020??????????????????002100

Baryonyx 0[3 4]1110110011012000?100102?000111100010-12[1 2]1000110020??0000000010000-121[0 1]000000000[1 2]01[0 1]000[0 1]00[0 1][0 1]2111000202[0 2]00000[1 2]00-10100031??????????????????010111

Suchomimus 041110110011012000010010220001111?0010-???1000110020??00000000[1 2]0000-1[1 2][1 2][0 1]000000000[1 2]01[0 1]0[0 1][0 1][0 1]00[0 1][0 1]1010002202[0 2]00000[1 2]00-10[1 2][0 1]0031????????????????????????

'Irritator_Angaturama' 0410001??021012100?????0220?0???????1?????????????????????????????0-12[1 2]210000101010100-----------------------210-101[0 1]000-????????????????????????

Spinosaurus 0312[0 1]011012101220041001123020111[1 2]10010-?[1 2]??1001010[1 2]001--------20000-2[1 2][1 2][1 2]100001010[0 1]0100-----------------------220-0---0031??????????????????0101?[0 1]

Erectopus ??????????????????????000?????????????????????????????????????????0-10[1 2]00101000001000022100[0 1]011010000000000100-1[0 1]0---000-????????????????????????

Sinraptor 011111000000000000[3 4]01000020200?1000010-1[1 2 3]?11[2 3][1 3]1101[1 2]0102210[0 1]00[1 2]02000-2[0 1][0 1][0 1]0[1 2][0 1 2][2 3]00000[1 2]0[0 1][0 1][0 1]221[0 1][0 1]00[1 2]1000000000011[1 2][0 1]0-211010000-??????????????????001[0 1]01

Allosaurus 021110011000000000[2 3]00100020201[0 1]1000010-1[2 3][0 1 2][0 1][0 1][2 3][2 3]110[1 2]10102[2 3]1[0 1][0 1]00[0 1 2]0[0 2][0 1]00-2[0 1 2][1 2][0 1]000[0 1 2]00000[1 2]1[0 1][0 1]1[1 2][1 2]1[0 1][0 1][0 1]011000[0 1]00000011[1 2][1 2]0-2[0 1]2[0 1]1[0 1]00[0 1]02202110011111200000[0 1][0 1][0 1]1[0 1]

Neovenator 0211112011200000003100000?0?001100001?????????????????????????????0-111001[1 2]2000000011[0 1]2[1 2]11100110010-0000011110-2[0 1]20100020??????????????????10211[0 1]

Fukuiraptor ??????????????????????000?0?0?1??000?0-1[1 2]?0030110210??[0 1]110[0 1]0??00000-1[0 1][0 1 2]00??100000[0 1]0010[1 2][1 2]1[0 1][0 1]000[0 1]0?0000000002220-[1 2]020?000??????????????????????????

Australovenator ??????????????????????????01001?0000?0-1[1 2][2 3]00?3110210??1[1 2]1?????00000-1[0 1]100[2 3][1 2]?00000000?[0 1]221?[0 1]?00[0 1]0??0-000001???0-??????0020????????????????????????

Megaraptor 0?[1 2]11??0?0??00??0030100002????????????????10?3100200??-11-0-00000?0-1[0 1][0 1]002231-00---00[0 1]-11-0-0-100-0--00-01-000-100---0010??????????????????100100

Orkoraptor ??????????????????????????????????????????????????????????????????0-1??003231-00---[0 1][0 1][0 1]-21-0-0-100-0--0?-?1-110-??0---0[0 2]10??????????????????0?1???

Acrocanthosaurus 01111100000000000031010002020011000010-2[1 2][1 2]100011000[0 1]00[1 2]210020000000-2[0 1][0 1 2]0000?00000[0 1]011[0 1][1 2][1 2][0 1]001[0 1]110111010[1 2]0010[0 1]00-2[0 1][1 2][0 1]100020????????????????????????

Eocarcharia ?????????????????0310?000?????????????????????????????????????????0-101[0 3]0002000000011[0 1]211[0 1][0 1]0[0 2][1 2]10110-1011001110-100---0010????????????????????????

Carcharodontosaurus ?????????????????0400100020?0?1?0000??????????????????????????????102[0 1]1[1 2 3]00010000120110[2 3][2 3]1110010011[0 1]00001001[0 1][0 1]0-[0 1]021200010??????????????????001100

Giganotosaurus 01111101111?000000??0?000?02001?000010-02?110011001000221?00?10000102[0 1][1 2][0 3]000100000[1 2]0110[2 3][2 3]1[0 1][0 1]001[0 1]00000000001[1 2]220-[1 2]0[1 2]0200010??????????????????00[1 2]100

Mapusaurus ?????????????????04101000?0?0???0000?0-12[2 3]10001101?1??221??0000000102[0 1][0 1][0 1 3]000100000[1 2]0110[2 3][2 3]1[0 1][0 1]001100000000001[1 2]220-0-[1 2][0 1]200010??????????????????[0 1]0[1 2]100

Bicentenaria ???000???00?0???0??????0?????????????0-?[1 2]???00??0??0?0?0??0??000000?0?100?010000010000001000001000000002000000-0-0---0020??????????????????0000??

Proceratosaurus 011111000000000000011100?201021101001100?[2 3]103[0 3]1102011[1 2]0010020000010-1[0 1][0 1]00[1 2]0[1 3]00000[0 1]10[0 1]10[0 1]10000000000-0002000[0 1][0 1]0-0-0---0010????????????????????????

Eotyrannus 01211100000000000???10001?0?02100000?0-1311[0 1]43110311??[1 2][1 2]10000100000-111[0 1]000100000001001[1 2]10000000000-0002000110-0-0---0010????????????????????1???

Raptorex 01211100000000000040010002020211000010-03[0 1]104211031121??10020000100-?[0 1][0 1]00[0 1]0100000[0 1]1[0 1][0 1]1??100[0 1][0 2]1[0 1]000000000000100-100---0010??????????????????0?1000

Gorgosaurus 012211000000000000[3 4]0110002020011000010-1[2 3][0 1 2 3]1142110[2 3]1[0 1][1 2][0 1]1[1 2]1?000000[0 1]00-1[0 1 2][1 2][0 1]000[0 1]00000[0 1]1[0 1]01[1 2][1 2]100[0 1]01[0 1]00000[0 2]0[0 2]00111[0 1]0-1[0 1]0---0010220310101001011112001000

Alioramus ?????????????????02111000201021100001?????????????????????????????0-?[0 1][0 1]00[1 2]0[1 3]00000[0 1]1[0 1]01??100001[0 1]000[0 1]00000000100-210---0010??????????????????001000

Daspletosaurus 012211000000000000[2 3 4][0 1]100002020011000010-13[0 1]11421[0 1][0 1][2 3][0 1][0 1]2[0 1]221[0 1]0[0 2]0100100-2[0 1 2][0 1 2][0 1]000[0 1]0000011[0 1]0[0 1][2 3]2111[0 1]01[0 1]00000[0 2]0[0 2]0011[1 2]10-[1 2]11000001022021101---1011112[0 1][0 1][0 1][0 1]1[0 1]

Tyrannosaurus 01221100000000000041110002030211000010-233[0 1]04[0 2]11031[0 1][1 2][0 1][2 3][2 3]10000000[0 1]00-2[1 2][0 1 2][0 1]000000000[0 1]1001[2 3][2 3]100001[0 1]0100020200122?0-2[0 1]112[0 1]00[0 1]022021101---0-01112001[0 1]0[0 1]

Compsognathus 01?100?000?1?0??00210?00?20100?1000010-0?3[0 1 2]0?00-1-------------00000-0[0 1][0 1]0000?1-0[0 1]---2??-01-0-[0 1]-20--0--00-10-000-0-0---000-??????????????????10?000

Juravenator 01??00?00?01?0?000510000?2?3?????????0-0?[0 1 2]00??0-[0 1]--?-0-0--0-1000000-0?[1 2]00?011-01---2??-01-0-0-[0 2]0-----[0 1]0-[0 1]0-000-0-0---000-??????????????????10??00

Scipionyx 02?100-11122?00100510000?2030011000010-??2000?0-1-------------10000-??[0 1 2][0 1]02011-00---[0 2]??-?--0-0-[0 2]0--0--?0-10-000-0-0---000-????????????????????????

Ornitholestes 01110012[0 2]021?000104101000203000101001100[1 2 3]21[0 1][3 4][0 3][0 1]0111010--------00000-0[1 2][0 1]0[0 1]001[0 1]10[0 1]?10201-01-0-0-00--0--?0-1?-0-0-[0 1]00---0010??????????????????0?[0 1]??1

Nqwebasaurus ?????????????????2????0234????????????????????????????????????????0-022210001-1------------------------------0-0-0---000-????????????????????????

Pelecanimimus 04??????????0000020???00340011?100001110??1[0 1]3?0-1-------------0000[1 2]10?0[0 1][0 1]00?1-1------------------------------0-0-0---000-??????????????????0?0?0?

Shenzhousaurus 3----------------3--------230-?-011010-02?22000-1-------------00000-021210001-1------------------------------0-0-0---000-????????????????????????

Garudimimus 3----------------3--------3---------1------------------------------------------------------------------------------------------------------------

Struthiomimus 3----------------3--------3---------1------------------------------------------------------------------------------------------------------------

Haplocheirus 01??00000000000000012?00[0 2]2000?1?00001000?210000-1--0-0--------00000-0[1 2][1 2]0000?[0 1]0000000??0[0 1]1000000000[0 1]-??0?[0 1]10000-0-0---030-????????????????????????

Shuvuuia ?????????????????2000100340010000000?1102?22000-1-------------00?011021210001-1------------------------------0-0-0---000-??????????????????0?0???

Mononykus ??????????????????????????????????????????????????????????????????1?021210001-1------------------------------0-0-0---030-??????????????????0?0?0?

Eshanosaurus ??????????????????????????0001??0?00??????????????????????????????21021[1 2]00000000000200112[0 1][0 1 2]00[0 2][0 2]0000-[1 2]-20010000-0-0---0[0 1]0-??????????????????1?0?0?

Falcarius ?????????????????0?100002?000???000011002[2 3]220[0 5]001-------------0000210[1 2][0 1][2 4]00[0 2 3]000000012000010000[0 1][0 2]0000-1-1[0 2]00[0 2][0 2]00-100---0[0 1]0-000[0 1]?0-[0 1]00022----0[0 1][0 1]010[0 1]

Jianchangosaurus 3----------------0000?00?2?0000-0000?211221004110201201?2220000?0021021[2 4]00[0 3]000000002002222200000011-2-20010000-0-0---000-??????????????????110?01

Erlikosaurus 3----------------10???00?210010?010011002222000-0--0-0-02-1-?0000021021200000000000200??2[0 2][0 2]00020011-2-20010000-0-0---000-??????????????????110??1

Incisivosaurus 0100001222010000005101000213[0 1]00?01101001?22[1 2]001010?010--------00001?0?021000[0 1]?[0 1][0 1]??0200-?01?0?0?10??0??-???0?0--0-0---00[0 3]0????????????????????????

Caudipteryx 11????[1 2]--????10013--------3---------10-0?0[0 2][0 1]?-0-1-------------0000-----------------------------------------------------0-??????????????????10[1 2]00[0 1]

Chirostenotes 3----------------3--------3---------1------------------------------------------------------------------------------------------------------------

Citipati 3----------------3--------3---------1------------------------------------------------------------------------------------------------------------

Halszkaraptor 041111000000000000001?0001010???0???11?0??003-0-1-------------00?00-0??000011-1------------------------------0-??????00????????????????????0[0 1]?0?0

Buitreraptor ?????????????????0?????0020?0??00000??????????????????????????????0-0[0 1][0 1]003[0 1]31-1------------------------------0-0-0---[1 3][1 2]0-??????????????????1?1?00

Microraptor 011000100[0 1]20?00000401?00?20?0?110[0 1]0010-0?[1 2][0 1]0?[0 3]0-1--0-0--------00[0 1 2]0100?1[0 1]03131-0[0 1]---[0 2]??-0[1 2]-0-0-[0 2]0--0--1--[0 1]0-00[0 2]00-0---0[0 2][0 1]0??????????????????0[0 1]??00

Sinornithosaurus 011000101020?00000?01000?20?0011010010-0?[2 3][0 1]0?[2 3]1[0 1][0 1][0 1][0 1][0 1]10001[0 1][0 1]?1002[0 1 2]00-[0 1]?1003[0 1]30[0 1]000000??00100[0 1][0 1]0[0 2]000000002[0 1]0000210-0---0010??????????????????[0 1]01[0 1]00

Dromaeosaurus 0????00?1??000000050010002030010000010-1[1 2 3][1 2][0 1]03[1 3]110210201111[0 1]00100000-1[0 1]100[2 3][0 1]300000[0 1]1001[1 2][1 2]100000[0 1]000100000000100-100---0010201110-000112----2??????

Atrociraptor 010000000?20000000400103?20300110000?0-[0 1]1[2 3]113[1 3]110[1 2]1010[0 1 2][0 1]1[1 2][1 2]20[0 1]00000-1[0 1][0 1][0 1]020?00000[0 1]0000[0 1][1 2]102[0 1]00[0 1]0001000020001[0 1]0-100---0010??????????????????00?00[0 1]

Bambiraptor 01??00??????0000004???03?2030?100000??????????????????????????????0-0[0 1]1003[0 1]3[0 1]0000000000010[0 1]0001000[0 1]-?002010000-0-0---0[0 2]1000000--1---12-----??????

Tsaagan 011100110021?00000400?00?20[2 3]0010000010-1?3[0 1][0 1]000-0--0-0-01-0-0000?00-1?1[0 1]02031-00---000-11-0-0-10--0--00-00-000-0-0---000-????????????????????????

Velociraptor 011000110?21?00000[3 4]10?00?20[2 3]0011000010-00310300-0--0-0-01-0-?030?00-00[0 1][0 1]021?[0 1]00000000001100000[0 1]0000-0022000000-0-0---0[0 1 2]0-100110-00000-----1??????

Deinonychus 01000011000100000?3?110302020000000010-01[2 3]1[0 1][1 3]3110210?0011[0 1]120002000-1[0 1][0 1]0020200000[0 1]0000[0 1][1 2]1011001000[0 1][0 2]0[0 2][0 2]20101[0 1]0-1[0 1]0---0010200110-000012----0001100

Saurornitholestes 01?????????????00??101000?0200010100?0-002[0 1][0 1]331[0 1]021[0 1]200[1 2]1[0 1][1 2]20100000-1[0 1]1002[1 2][2 3]0[0 1]000[0 1]1[0 1]00[0 1][0 1]1[0 1][1 2]0001000000002010110-110---0010211110-00020-----1001000

'MPC_D100_1128' 0???1?????0?000?020????0?3001??00?00?1102222000-1-------------0000[1 2]1021[0 1 2][0 1]0001-1------------------------------0-0-0---000-??????????????????1?0?0?

Almas 0???00000??0?00002121100?30112100001?110?222000-1-------------0000[1 2]10?[0 1][1 2]00001-1------------------------------0-0-0---000-00000--1---22-----1???0?

Sinusonasus 0????0??1??0?00000121?00?20[0 1]?2010?01?[1 2]10?3[1 2][0 2]??0-1-------------0000[1 2]00?0[0 1 2]00??1-[0 1][0 1]---2?0-02-0-0-[0 2]0--0--1--0[0 1]-000-0-0---000-????????????????????????

Byronosaurus 0101000110?0000002021100?200100?0001?100?211010-1----1--------0000[1 2]00[1 2][1 2][0 1]0[0 1 2 3][0 1][2 4]1-1------------------------------0-0-0---[1 3][1 2]0-00000--1---22-----??????

Zanabazar 010100000000000000[0 1]211000300100100011110?3112?1102?010222??0--0000[1 2]10[1 2][0 1][0 1]001[1 3][0 1]1000?0000[1 2][1 2]2?2?0?000?1??1221[0 1]0000-0-0---200-????????????????????????

Troodon 01????????????????????????00100?00011210221050[0 1][0 1]0010??332220000000[1 2]111[0 1][0 1]0[0 2][1 3 4]1[0 1][0 1]00010000[2 3][2 3][1 2]22[1 2]00[0 1]001100000010000-100---000-110110-00020-----11[0 1]1101

Epidexipteryx 01?000121020?0?0125--112??23?1200110?0-0?0[0 1]0?00-1-------------00000-0?[0 1]10?0?1-1------------------------------0-0-0---000-??????????????????00??0[0 1]

Archaeopteryx 01?000011000?000[0 1]0500100?303001000[0 1]01100?310?00-1-------------0000100?[0 1][0 1]000?1-1------------------------------0-0-0---000-??????????????????10?00?

'GLAHM_125390a_mesial' ???????????????????????????????????????11310????0??0???01?0?010000??????????????????????????????????????????????????0-???????????????????????????

'GLAHM_125390a_lateral' ????????????????????????????????????????????????????????????????????11110?????00???000?[0 1]1?0?0?10??0??00?01?[0 1]10-100---000-????????????????????????

'Large_Skye_tooth_mesial' ???????????????????????????????????????1[0 1]200??110[0 1]?0??221?0000000????????????????????????????????????????????????????????????????????????????????

'Large_Skye_tooth_lateral' ????????????????????????????????????????????????????????????????????1[0 1]110???0000??[0 1][0 1]00221?0?0010??0?00?001000[0 1]???????????????????????????????????

'Small_Skye_tooth_mesial' ???????????????????????????????????????????[0 1]??0-0--1-?-0?-0-0??????????????????????????????????????????????????????????0-????????????????????????

'Small_Skye_tooth_lateral' ????????????????????????????????????????????????????????????????????????????1-00---??1-1?-0-0-10--0--?2-01-????????????0-????????????????????????

;

cnames

{0 Premaxillary_teeth present_in_the_anterior_and_posterior_portions_of_the_premaxilla absent_in_the_posterior_portion_of_the_premaxilla absent_in_the_anterior_portion_of_the_premaxilla absent_in_the_whole_premaxilla,_toothless_premaxilla;

{1 Number_of_premaxillary_teeth_(or_alveoli) 3_or_less 4 5 6 7_or_more;

{2 Premaxillary_alveoli,_direction_of_main_axis_of_elongation_in_palatal_view all_alveoli_mesio-distally_oriented anterior_alveoli_labio-lingually_oriented,_posterior_alveoli_mesio-distally_oriented all_alveoli_labio-lingually_oriented;

{3 Premaxillary_alveoli,_overlap_of_the_first_and_second_alveoli_in_palatal_view absent present,_partial present,_complete;

{4 Premaxillary_alveoli,_overlap_of_the_second_and_third_alveoli_in_palatal_view absent present;

{5 Premaxillary_alveoli,_overlap_of_the_third_and_fourth_alveoli_in_palatal_view absent present;

{6 Premaxillary_teeth_(or_alveoli),_size all_approximately_equal_in_size posterior_teeth_(or_alveoli)_smaller_than_anterior_teeth_(or_alveoli) anterior_teeth_(or_alveoli)_smaller_than_posterior_teeth_(or_alveoli);

{7 Anterior_premaxillary_teeth_(or_alveoli),_size significantly_smaller_than_the_first_six_anterior_maxillary_teeth_(or_alveoli) subequal_in_size_than_the_first_six_anterior_maxillary_teeth_(or_alveoli) significantly_larger_than_the_first_six_anterior_maxillary_teeth_(or_alveoli);

{8 Posterior_premaxillary_teeth_(or_alveoli),_size significantly_smaller_than_the_first_six_anterior_maxillary_teeth_(or_alveoli) subequal_in_size_than_the_first_six_anterior__maxillary_teeth_(or_alveoli) significantly_larger_than_the_first_six_anterior_maxillary_teeth_(or_alveoli);

{9 First_premaxillary_tooth_(or_alveolus),_size subequal_in_size_than_second_tooth_(or_alveolus) significantly_smaller_than_second_tooth_(or_alveolus) significantly_bigger_than_second_tooth_(or_alveolus);

{10 Second_premaxillary_tooth_(or_alveolus),_size subequal_in_size_than_third_(and_fourth)_premaxillary_tooth_(or_alveolus) significantly_smaller_than_third_(and_fourth)_tooth_(or_alveolus) significantly_larger_than_third_(and_fourth)_tooth_(or_alveolus);

{11 Posteriormost_premaxillary_tooth_(or_alveolus),_mesiodistal_length_in_palatal_view subequal_in_size_than_more_anterior_teeth_(or_alveoli) significantly_smaller_than_more_anterior_teeth_(or_alveoli) significantly_larger_than_anterior_teeth_(or_alveoli);

{12 Distal_premaxillary_alveoli,_shape_in_palatal_view oval_to_subcircular subrectangular;

{13 Premaxillary_tooth_row,_posterior_extension_(position_of_posteriormost_premaxillary_tooth)_ aligned_(ventral)_to_external_naris anterior_to_external_naris_;

{14 Premaxilla_in_palatal_view unconstricted slightly_constricted strongly_constricted,_terminal_rosette_of_premaxilla;

{15 Subnarial_gap/diastema_(i.e.,_posterior_part_of_premaxillary_alveolar_margin_unedentelous,_resulting_in_an_interruption_of_the_upper_tooth_row) absent_ present_and_short,_diastema_not_extensive_enough_to_host_more_than_one_tooth present_and_long,_diastema_extensive_enough_to_host_more_than_one_tooth;

{16 First_premaxillary_alveoli_open ventrally,_decumbent_teeth anteroventrally,_procumbent_teeth;

{17 Maxillary_teeth present_in_the_anterior_and_posterior_portions_of_the_maxilla_(posteriormost_portion_excluded) absent_in_the_anteriormost_portion_of_the_maxilla absent_in_the_posterior_portion_of_the_maxilla_(i.e.,_tooth_row_extending_only_on_the_anterior_75%_of_the_bone_or_less) absent_in_the_whole_maxilla,_toothless_maxilla;

{18 Number_of_maxillary_teeth_(or_alveoli) >19 18-19 16-17 15 10-14 _1-9;

{19 Anterior_maxillary_teeth_(or_alveoli),_size subequal_in_size_than_posterior_teeth_(or_alveoli) significantly_larger_than_posterior_maxillary_teeth_(or_alveoli) significantly_smaller_than_posterior_maxillary_teeth_(or_alveoli);

{20 Mid-maxillary_teeth_(or_alveoli),_mesiodistal_length subequal_in_size_than_anteriormost_maxillary_teeth_(or_alveoli) significantly_larger_than_anteriormost_maxillary_teeth_(or_alveoli) significantly_smaller_than_anteriormost_maxillary_teeth_(or_alveoli);

{21 First_maxillary_tooth_(or_alveolus),_size significantly_smaller_than_second_tooth_(or_alveolus) subequal_in_size_than_second_tooth_(or_alveolus);

{22 First_maxillary_teeth_(or_alveoli)_open ventrally,_decumbent_teeth anteroventrally,_procumbent_teeth;

{23 Mid-maxillary_teeth,_inclination pointing_ventrally_(decumbent) pointing_lateroventrally_(laterocumbent) pointing_anteroventrally_(procumbent) pointing_posteroventrally_(retrocumbent);

{24 Maxillary_alveoli,_shape_in_palatal_view oval_to_lenticular subrectangular circular merged_to_form_an_open_alveolar__groove_(interdental_septa_absent);

{25 Maxillary_tooth_row,_posterior_extension_(position_of_posteriormost_tooth) posterior_to_the_anteriormost_rim_of_orbit anterior_or_aligned_to_the_anteriormost_rim_of_orbit,_posterior_to_the_posteriormost_rim_of_antorbital_fenestra anterior_or_aligned_to_the_posteriormost_rim_of_antorbital_fenestra,_posterior_to_the_anteriormost_rim_of_antorbital_fenestra aligned_to_the_anteriormost_rim_of_antorbital_fenestra anterior_to_the_anteroventral_rim_of_the_antorbital_fenestra;

{26 Dentary_teeth present_in_the_anterior_and_posterior_portions_of_the_dentary absent_in_the_anteriormost_portion_of_the_dentary absent_in_the_posterior_portion_of_the_dentary_(i.e.,_tooth_row_extending_only_on_the_anterior_75%_of_the_bone_or_less) absent_in_the_whole_dentary,_toothless_dentary;

{27 Number_of_dentary_teeth_(or_alveoli) >_25 18-25 15-17 <_15;

{28 Dentary_alveoli_in_dorsal_view in_separate_alveoli merged_to_form_an_open_alveolar_groove_(interdental_septa_absent);

{29 Anteriormost_dentary_teeth_(or_alveoli),_size subequal_in_size_than_mid-_and_posterior_dentary_teeth_(or_alveoli) significantly_larger_than_mid-_and_posterior_dentary_teeth_(or_alveoli) significantly_smaller_than_mid-_and_posterior_dentary_teeth_(or_alveoli);

{30 First_dentary_tooth_(or_alveolus),_size_in_comparison_to_second_and_third_dentary_alveoli subequal_in_size first_tooth_(or_alveolus)_substantially_smaller_ first_tooth_(or_alveolus)_substantially_larger;

{31 Mid-dentary_teeth_(or_alveoli),_size subequal_in_size_than_anterior_maxillary_teeth_(or_alveoli) significantly_smaller_than_anterior_maxillary_teeth_(or_alveoli) significantly_larger_than_anterior_maxillary_teeth_(or_alveoli);

{32 Terminal_rosette_of_dentary,_number_of_teeth_(or_alveoli) terminal_rosette_absent four_teeth_(or_alveoli) five_teeth_(or_alveoli);

{33 First_dentary_alveoli_open dorsally anterodorsally,_procumbent_teeth;

{34 Mid-dentary_teeth,_inclination pointing_dorsally pointing_anterodorsally,_procumbent;

{35 Dentary_teeth,_spacing evenly_spaced anterior_dentary_teeth_more_closely_appressed_than_those_in_middle_and_posterior_parts_of_the_tooth_row;

{36 Palatal_teeth_on_the_pterygoid present absent;

{37 Mesial_teeth,_constriction_between_root_and_crown absent constriction_weak,_base_of_crown_occupying_more_than_85%_of_largest_crown_width constriction_important,_base_of_crown_occupying_85%_or_less_of_largest_crown_width;

{38 Mesial_teeth,_constriction_between_root_and_crown_along_the_tooth_row present_in_some_teeth present_in_all_teeth;

{39 Mesial_teeth,_height_of_the_largest_crown_(CH_in_centimetres)_in_subadult/adults CH_?_1 1_<_CH_?_6 CH_>_6;

{40 Mesial_teeth,_labiolingual_compression_of_the_crown_(CBR_=_CBW/CBL) CBR_<_0.5,_lenticular_and_strongly_labiolingually_compressed 0.5<CBR_?_0.75,_oval_to_lenticular weak,_0.75_<_CBR_<_1.2,_tooth_subcircular CBR_?_1.2,_teeth_labiolingually_elongated;

{41 Mesial_teeth,_baso-apical_elongation_of_the_crown_(CHR_=_CH/CBL) strongly_elongated,_CHR_>_3 important,_2.5_<_CHR_?_3 normal,_2_<_CHR_?_2.5 weak,_CHR_?_2;

{42 Mesial_teeth,_crown_recurvature_(lingually_or_distally) present,_strongly_recurved present,_slightly_recurved absent,_tooth_crown_straight_and_apex_centrally_positioned_or_almost_centrally_positioned;

{43 Mesial_teeth,_distal_margin_of_the_crown_in_lateral_view mainly_concave straight mainly_convex;

{44 Mesial_teeth,_outline_of_basal_cross-section_of_the_crown_in_the_mesialmost_tooth subcircular,_ovoid_or_elliptical lanceolate,_with_acute_and_well-developed_distal_carina Salinon_shape,_with_labial_margin_convex_and_lingual_margin_biconcave D-shaped_or_J-shaped,_with_lingual_margins_strongly_convex_and_labial_margin_convex_or_sigmoid U-shaped,_with_mesial_and_distal_margin_subparalell lenticular,_with_acute_and_well-developed_distal_and_mesial_carinae;

{45 Mesial_teeth,_concave_surface_adjacent_to_the_carina absent on_the_labial_surface_and_adjacent_to_the_distal_carina on_the_lingual_surface_and_adjacent_to_both_carinae on_the_lingual_surface_and_adjacent_to_the_mesial_carina_only on_the_lingual_surface_and_adjacent_to_the_distal_carina_only one_main_concave_surface_centrally_positioned_on_the_lingual_side_of_the_crown;

{46 Mesial_teeth,_mesial_carina absent present;

{47 Mesial_teeth,_mesial_carina non-serrated serrated;

{48 Mesial_teeth,_distal_carina serrated non-serrated;

{49 Mesial_teeth,_mesial_carina straight_and_centrally_positioned_on_the_crown slightly_twisted,_curves_onto_the_mesiolingual_surface strongly_twisted,_curves_onto_the_lingual_surface almost_straight_and_strongly_lingually_deflected;

{50 Mesial_teeth,_mesial_carina,_and_if_serrated,_mesial_serration terminates_well-above_the_cervix extends_to_the_cervix_or_just_above_it terminates_well_beneath_the_cervix;

{51 Mesial_teeth,_distal_carina centrally_positioned_or_slightly_displaced strongly_labially_deflected;

{52 Mesial_teeth,_position_of_mesial_carina_on_the_crown_in_articulation_in_mesialmost_teeth facing_mostly_labially facing_mostly_mesially facing_mostly_lingually;

{53 Mesial_teeth,_position_of_distal_carina_on_the_crown_in_articulation_in_mesialmost_teeth facing_mostly_distally_or_labiodistally facing_mostly_lingually;

{54 Mesial_teeth,_average_number_of_denticles_per_five_millimetres_on_mesial_carina_at_thirds_height_of_the_crown_(MCA)_in_subadult/adult ?_20 14-19 9-13 ?_8;

{55 Mesial_teeth,_average_number_of_mid-crown_denticles_per_five_millimetres_on_distal_carina_(DC)_in_subadult/adult ?_20 14-19 9-13 ?_8;

{56 Mesial_teeth,_denticle_size_(except_in_embryos_and_hatchlings) minute_denticles,_more_than_250_denticles_on_the_distal_carina normal_in_height,_between_15_to_250_denticles_on_the_distal_carina very_larges_denticles,_less_than_15_denticles_on_the_distal_carina;

{57 Mesial_teeth,_denticles_on_mesial_carina rounded_and_symmetrically_convex_ rounded_and_asymmetrically_convex strongly_hooked/pointed,_denticles_with_a_tip_pointing_apically;

{58 Mesial_teeth,_denticles_on_distal_carina rounded_and_symmetrically_convex_ rounded_and_asymmetrically_convex strongly_hooked/pointed,_denticles_with_a_tip_pointing_apically;

{59 Mesial_teeth,_size_of_mesial_denticles_relative_to_distal_denticles_(DSDI) mesial_and_distal_denticles_of_same_size,_0.8_<_DSDI_<1.2 mesial_denticles_larger_than_distal_ones,_DSDI_<_0.8 distal_denticles_larger_than_mesial_ones,_DSDI_>_1.2;

{60 Mesial_teeth,_denticles_contiguous_over_tip_or_very_close_to_the_apex present absent_;

{61 Mesial_teeth,_interdenticular_sulci absent present,_short present,_long_and_well-developed;

{62 Mesial_teeth,_flutes_(i.e.,_subparallel_longitudinal_grooves_separated_by_acute_ridges)_on_the_crown absent present_on_the_lingual_surface_only present_on_both_labial_and_lingual_surfaces present_on_the_labial_surface_only;

{63 Mesial_teeth,_longitudinal_groove_on_the_labial_and/or_lingual_side_of_the_crown absent present,_a_single_groove_centrally_positioned present,_a_single_groove_mesially_positioned;

{64 Mesial_teeth,_longitudinal_ridge,_different_of_flutes,_on_the_lingual_side_of_the_crown absent present,_a_single_ridge_centrally_positioned;

{65 Mesial_teeth,_basal_striations,_different_of_flutes,_on_both_lingual_and_labial_sides_of_the_crown absent present;

{66 Lateral_teeth,_constriction_between_root_and_crown absent constriction_weak,_base_of_crown_base_occupying_more_than_85%_of_largest_crown_width_mesiodistally constriction_important,_base_of_crown_base_occupying_85%_or_less_of_largest_crown_width_mesiodistally;

{67 Lateral_teeth,_constriction_between_root_and_crown_along_the_tooth_row present_in_some_teeth present_in_all_teeth;

{68 Lateral_teeth,_height_of_the_largest_crown_(CH_in_centimetres)_in_subadult/adults CH_?_1 1_<_CH_?_6 CH_>_6;

{69 Lateral_teeth,_labiolingual_compression_of_the_crown_(CBR_=_CBW/CBL) important,_CBR_?_0.5,_tooth_strongly_flattened normal,_0.5_<_CBR_?_0.75 weak,_CBR_>_0.75,_tooth_incrassate_or_subcircular;

{70 Lateral_teeth,_baso-apical_elongation_of_the_crown_(CHR_=_CH/CBL) weak,_CHR_?_1.5 normal,_1.5_<_CHR_?_2.5 important,_CHR_>_2.5;

{71 Lateral_teeth,_distal_margin_of_crown_in_lateral_view strongly_concave slightly_concave,_roughly_straight,_or_straight,_apex_positioned_at_the_same_level_as_distal_profile convex,_apex_positioned_mesial_to_mesial_profile sigmoid,_basal_half_concave_and_apical_half_convex sigmoid,_basal_half_convex_and_apical_half_concave;

{72 Lateral_teeth,_mesial_margin_of_crown_in_lateral_view strongly_convex slightly_convex,_almost_straight;

{73 Lateral_teeth,_mesiodistal_curvature_of_the_labial_surface_of_the_crown_at_one_third_of_the_crown convex surface_centrally_positioned_on_the_crown_roughly_flattened surface_centrally_positioned_on_the_crown_concave,_labial_depression_restricted_to_the_crown_base surface_centrally_positioned_on_the_crown_concave,_labial_depression_extends_along_the_basal_half_of_the_crown_or_more_apically;

{74 Lateral_teeth,_concave_surface_adjacent_to_carinae_all_along_the_crown absent present_on_labial_surface_and_adjacent_to_distal_carina present_on_lingual_surface_and_adjacent_to_distal_carina present_on_labial_surface_and_adjacent_to_both_mesial_and_distal_carinae present_on_lingual_surface_and_adjacent_to_both_mesial_and_distal_carinae;

{75 Lateral_teeth,_outline_of_basal_cross-section_of_the_crown subcircular lenticular_or_lanceolate elliptical_or_bean-shaped_(i.e.,_longitudinal_depression_centrally_positioned_on_one_side_only) 8-shaped_(i.e.,_longitudinal_depression_centrally_positioned_on_both_lingual_and_labial_margins) Subrectangular;

{76 Lateral_teeth,_mesial_carina present absent;

{77 Lateral_teeth,_mesial_carina serrated non-serrated;

{78 Lateral_teeth,_distal_carina present absent;

{79 Lateral_teeth,_distal_carina serrated non-serrated;

{80 Lateral_teeth,_extension_of_mesial_carina_relative_to_distal_carina mesial_carina_extends_at_the_same_level_or_terminates_more_apically_than_the_distal_carina mesial_carina_extends_more_basally_than_the_distal_carina;

{81 Lateral_teeth,_mesial_carina,_and_if_serrated,_basalmost_serration_of_the_mesial_carina terminates_around_mid-height_of_crown_or_more_apically extends_to_base_of_crown_or_slightly_above_the_cervix terminates_well_beneath_the_cervix;

{82 Lateral_teeth,_twisted_mesial_carina_in_some_crowns absent,_mesial_carina_centrally_positioned_on_mesial_margin_or_weakly_curved_lingually_towards_the_base_in_all_teeth present,_mesial_carina_strongly_twisting_onto_the_mesiolingual_surface_in_some_teeth;

{83 Lateral_teeth,_distal_carina,_and_if_serrated,_basalmost_serration_of_the_distal_carina extends_to_the_cervix_or_just_above_it terminates_well_beneath_the_cervix terminates_well_above_the_cervix;

{84 Lateral_teeth,_profile_of_the_distal_carina_on_the_crown_in_distal_view straight_or_very_slightly_bowed strongly_bowed_or_sigmoid;

{85 Lateral_teeth,_position_of_distal_carina_on_the_crown_in_distal_view centrally_positioned_or_slightly_displaced,_crown_subsymmetrical strongly_labially_deflected,_crown_asymmetrical;

{86 Lateral_teeth,_average_number_of_denticles_per_five_millimeters_on_mesial_carina_at_two-thirds_height_of_the_crown_(MCA)_in_subadult/adult: ?_30 16-29 9-15 ?_8 <_9;

{87 Lateral_teeth,_average_number_of_mid-crown_denticles_per_five_millimetres_on_distal_carina_(DC)_in_subadult/adult ?_30 16-29 9-15 ?_8 <_9;

{88 Lateral_teeth,_denticle_number_on_both_mesial_and_distal_carinae_(except_in_embryos_and_hatchlings) more_than_250_denticles_(minute_denticles_or_very_large_number_of_denticles_of_normal_size) between_15_to_250_denticles_(denticles_of_average_size)_ less_than_15_denticles_(very_large_denticles_or_very_small_number_of_small_denticles);

{89 Lateral_teeth,_shape_of_denticles_on_mesial_carina_in_lateral_view symmetrically_convex_ asymmetrically_convex hooked/pointed;

{90 Lateral_teeth,_shape_of_denticles_on_distal_carina_in_lateral_view symmetrically_convex_ asymmetrically_convex hooked/pointed;

{91 Lateral_teeth,_shape_of_mesial_margin_of_rounded_denticles_on_mesial_carina_in_lateral_view parabolic subrectangular,_with_flattened_surface;

{92 Lateral_teeth,_shape_of_distal_margin_of_rounded_denticles_on_distal_carina_in_lateral_view parabolic subrectangular,_with_flattened_surface semi-circular;

{93 Lateral_teeth,_shape_of_denticles_at_two-thirds_height_of_the_crown_(MC-MA)_on_mesial_carina_in_lateral_view longer_apicobasally_than_mesiodistally,_vertical_subrectangular_ as_long_mediodistally_as_apicobasally,_subquadrangular longer_mediodistally_than_apicobasally,_horizontal_subrectangular;

{94 Lateral_teeth,_shape_of_mid-crown_denticles_(DC)_on_distal_carina_in_lateral_view as_long_mediodistally_as_apicobasally,_subquadrangular longer_mediodistally_than_apicobasally,_horizontal_subrectangular longer_apicobasally_than_mesiodistally,_vertical_subrectangular_;

{95 Lateral_teeth,_denticle_size_along_the_carinae regular,_gradual_change_in_denticle_size irregular,_sporadic_change_in_denticle_size;

{96 Lateral_teeth,_biconvex_apical_denticles_(i.e.,_biconvex_external_margin_of_denticle)_on_mesial_carina_in_lateral_view absent present;

{97 Lateral_teeth,_orientation_of_mesiodistal_axis_of_apical_denticles_on_mesial_carina_in_lateral_view perpendicular_to_mesial_margin inclined_apically_from_mesial_margin;

{98 Lateral_teeth,_orientation_of_mesiodistal_axis_of_mid-crown_denticles_on_distal_carina_in_lateral_view perpendicular_to_distal_margin inclined_apically_from_distal_margin;

{99 Lateral_teeth,_average_number_of_denticles_on_mesial_carina higher_number_of_denticles_basally_than_at_the_mid-crown lower_number_of_denticles_basally_than_at_the_mid-crown subequal_number_of_denticles_basally_than_at_the_mid-crown;

{100 Lateral_teeth,_average_number_of_denticles_on_mesial_carina higher_number_of_denticles_apically_than_at_the_mid-crown lower_number_of_denticles_apically_than_at_the_mid-crown subequal_number_of_denticles_apically_than_at_the_mid-crown;

{101 Lateral_teeth,_average_number_of_denticles_on_distal_carina_(except_in_embryos_and_hatchlings) higher_number_of_denticles_basally_than_at_the_mid-crown subequal_or_lower_number_of_denticles_basally_than_at_the_mid-crown;

{102 Lateral_teeth,_average_number_of_denticles_on_distal_carina higher_number_of_denticles_apically_than_at_the_mid-crown lower_number_of_denticles_apically_than_at_the_mid-crown subequal_number_of_denticles_apically_than_at_the_mid-crown;

{103 Lateral_teeth,_size_of_mesial_denticles_relative_to_distal_denticles_(DSDI) mesial_and_distal_denticles_of_same_size,_0.8_<_DSDI_<1.2 mesial_denticles_larger_than_distal_ones,_DSDI_<_0.8 distal_denticles_larger_than_mesial_ones,_DSDI_>_1.2;

{104 Lateral_teeth,_distal_denticles_on_the_apex contiguous_over_tip,_or_very_close_to_the_apex distal_denticles_disappear_well_beneath_apex;

{105 Lateral_teeth,_interdenticular_space_between_mid-crown_denticles_on_the_distal_carina narrow,_less_than_one_third_of_the_denticle_width broad,_more_than_one_third_of_the_denticle_width;

{106 Lateral_teeth,_interdenticular_sulci_between_apical_denticles_on_the_mesial_carina absent present,_short_and_poorly_developed,_shorter_than_proximodistal_denticle_height_ present,_long_and_well-developed,_equal_or_longer_than_proximodistal_denticle_;

{107 Lateral_teeth,_interdenticular_sulci_between_mid-crown_denticles_on_the_distal_carina absent present,_short_and_poorly_developed,_shorter_than_proximodistal_denticle_height_ present,_long_and_well-developed,_equal_or_longer_than_proximodistal_denticle_;

{108 Lateral_teeth,_interdenticular_sulci_between_basalmost_denticles_on_the_distal_carina absent present,_short_and_poorly_developed,_shorter_than_proximodistal_denticle_height_ present,_long_and_well-developed,_equal_or_longer_than_proximodistal_denticle_;

{109 Lateral_teeth,_flutes_(i.e.,_subparallel_longitudinal_grooves_separated_by_acute_ridges)_on_the_crown absent present_on_the_lingual_surface present_on_labial_surface_or_both_labial_and_lingual_surfaces;

{110 Lateral_teeth,_average_number_of_flutes_on_the_crown 1-7 7-8 >8;

{111 Lateral_teeth,_large_transversal_undulations_on_the_crown_in_some_teeth absent present,_tenuous_and_barely_visible_with_light present,_pronounced_and_well_visible_with_light;

{112 Lateral_teeth,_large_transversal_undulations_on_the_crown_in_some_teeth_when_present just_a_few numerous_and_closely_packed;

{113 Lateral_teeth,_marginal_undulations_(i.e.,_short_undulations_adjacent_to_carinae)_in_some_teeth absent_ present_and_short,_the_mesiodistal_elongation_is_less_than_four_times_the_space_separating_each_undulations present_and_elongated,__the_mesiodistal_elongation_is_longer_than_four_times_the_space_separating_each_undulations;

{114 Lateral_teeth,_marginal_undulations_in_some_teeth present_and_shallow,_only_visible_with_light present_and_pronounced,_well_visible_in_lateral_view;

{115 Lateral_teeth,_marginal_undulations_in_some_teeth present_only_on_the_mesial_side_of_the_crown present_only_on_the_distal_side_of_the_crown present_on_both_mesial_and_distal_sides;

{116 Lateral_teeth,_marginal_undulations_in_some_teeth present_and_mesio-distally_oriented present_and_diagonally_oriented;

{117 Lateral_teeth,_longitudinal_groove_on_the_labial_and/or_lingual_surface_of_the_crown absent present,_a_single_groove_centrally_positioned present,_a_single_groove_adjacent_to_mesial_carina present,_two_grooves_or_more;

{118 Lateral_teeth,_elongated_longitudinal_and_rounded_ridge_(differing_from_flutes)_on_the_lingual_surface_of_the_crown absent present,_a_single_ridge_centrally_positioned present,_two_or_three_ridges present,_several_fainted_ridges;

{119 Enamel_surface_texture smooth_or_irregular_(non-oriented)_texture_ braided_(oriented)_texture_not_clearly_visible_with_light braided_(oriented)_texture_clearly_visible_with_or_without_light deeply_veined/anastomosed_(oriented)_texture;

{120 Coarse_enamel_surface_texture remains_baso-apically/diagonally_oriented_or_slightly_curved_basally_close_to_the_carinae strongly_curved_basally_close_to_the_carinae;

{121 Enamel_microstructure,_enamel_tubules absent_or_rare common_only_in_basal_unit_layer_(BUL)_and/or_inner_potion_of_enamel common_and_extend_throughout_entire_enamel_thickness extremely_common_and_forming_an_integral_structural_component_of_enamel;

{122 Enamel_microstructure,_predominant_enamel_type parallel_crystallites basal_unit_layer_(BUL) columnar;

{123 Enamel_microstructure,_predominant_enamel_type,_percentage_of_enamel_thickness ?_75% <_75%;

{124 Enamel_microstructure,_number_of_enamel_types_present_in_schmelzmuster one two three four;

{125 Enamel_microstructure,_number_of_different_module_types_present_in_schmelzmuster one two;

{126 Enamel_microstructure,_boundary_between_first_and_second_enamel_types_from_the_enamel-dentine_junction_(EDJ) parallel_to_EDJ jagged,_varies_in_distance_from_EDJ;

{127 Enamel_microstructure,_boundary_between_second_and_third_enamel_types_from_the_EDJ parallel_to_EDJ jagged,_varies_in_distance_from_EDJ;

{128 Enamel_microstructure,_basal_unit_layer_(BUL) present absent;

{129 Enamel_microstructure,_basal_unit_layer_(BUL) poorly_developed well-developed,_with_distinct_planes_of_separation_between_adjacent_units;

{130 Enamel_microstructure,_basal_unit_layer_(BUL),_maximum_unit_diameter <_10_µm ?_10_µm;

{131 Enamel_microstructure,_basal_unit_layer_(BUL) <_25%_of_total_enamel_thickness 25-50%_of_total_enamel_thickness ?_50%_of_enamel_thickness;

{132 Enamel_microstructure,_incremental_lines absent faint,_poorly_defined well-defined;

{133 Enamel_microstructure,_incremental_lines present_in_one_section_of_the_schmelzmuster_only present_in_more_than_one_section_of_the_schmelzmuster_but_not_throughout_entire_schmelzmuster present_throughout_entire_schmelzmuster;

{134 Enamel_microstructure,_columnar_units_closest_to_the_EDJ,_shape_of_units_in_cross-sections polygons_with_sharp_corners_and_more_than_4_sides subcircular_or_polygons_with_rounded_corners_and_more_than_4_sides triangles_and/or_rectangles_with_sharp_corners;

{135 Enamel_microstructure,_columnar_units_closest_to_the_enamel-dentine_junction_(EDJ) extend_straight_and_unbroken_to_the_OES_or_to_within_20_µm_below_the_OES end,_split,_or_are_interrupter_less_than_two-thirds_of_the_distance_from_the_EDJ_to_OES;

{136 Enamel_microstructure,_columnar_units_closest_to_the_enamel-dentine_junction_(EDJ),_maximum_unit_diameter <_15_µm ?_15µm;

{137 Enamel_microstructure,_columnar_units_closest_to_the_outer_enamel_surface_(OES) no_dominant_direction_of_orientation,_planes_of_separations_equally_well-developed_in_all_directions distinct_longitudinal_orientation,_planes_of_separation_better_developed_in_an_apicobasal_(longitudinal)_direction;

{138 Enamel_microstructure,_ratio_of_thickest_enamel_type_in_schmelzmuster_divided_by_second_thickest_enamel_type >_7 1.3_to_7 1_to_1.3;

{139 Root,_shape_in_lateral_view with_subparallel_mesial_and_distal_margins with_convex_margins,_root_significantly_larger_than_base_crown;

{140 Root,_distal_shape_in_lateral_view broad strongly_tapered_apically;

{141 Root,_outline_of_mid-root_in_cross_section oval_to_subcircular 8-shape_(i.e.,_longitudinal_depression_centrally_positioned_on_both_lingual_and_labial_margins) bean-shaped_(i.e.,_longitudinal_depression_centrally_positioned_on_one_side_only);

{142 Root,_form_of_the_resorption_pit_in_lingual_view deep_and_well-delimited_depression shallow_concavity;

{143 Root,__transversal_undulations_below_the_cervix absent present;

{144 Root,_apicobasal_height_in_lateral_view less_than_twice_the_apicobasal_height_of_the_crown twice_or_more_the_apicobasal_height_of_the_crown;

;

ccode + 0 1 3 14 15 18 25 27 37 39 49 56 66 68 88 *;

force + [0 1 2 3 4 5 6 7 8 9 10 11 12 13 14 15 16 17 18 19 20 21 22 23 24 25 26 27 28 29 30 31 32 33 34 35 36 37 38 39 40 41 42 43 44 45 46 47 48 49 50 51 52 53 54 55 56 57 58 59 60 61 62 63 64 65 66 67 68 69 70 71 72 73 74 75 76 77 78 79 80 81 82 83 84 85 86 87 88 89 90 91 92 93 94 95 96 (97 98 99 100 101 102)] [1 2 3 4 5 6 7 8 9 10 11 12 13 14 15 16 17 18 19 20 21 22 23 24 25 26 27 28 29 30 31 32 33 34 35 36 37 38 39 40 41 42 43 44 45 46 47 48 49 50 51 52 53 54 55 56 57 58 59 60 61 62 63 64 65 66 67 68 69 70 71 72 73 74 75 76 77 78 79 80 81 82 83 84 85 86 87 88 89 90 91 92 93 94 95 96 (97 98 99 100 101 102)] [2 3 4 5 6 7 8 9 10 11 12 13 14 15 16 17 18 19 20 21 22 23 24 25 26 27 28 29 30 31 32 33 34 35 36 37 38 39 40 41 42 43 44 45 46 47 48 49 50 51 52 53 54 55 56 57 58 59 60 61 62 63 64 65 66 67 68 69 70 71 72 73 74 75 76 77 78 79 80 81 82 83 84 85 86 87 88 89 90 91 92 93 94 95 96 (97 98 99 100 101 102)] [3 4 5 6 7 8 9 10 11 12 13 14 15 16 17 18 19 20 21 22 23 24 25 26 27 28 29 30 31 32 33 34 35 36 37 38 39 40 41 42 43 44 45 46 47 48 49 50 51 52 53 54 55 56 57 58 59 60 61 62 63 64 65 66 67 68 69 70 71 72 73 74 75 76 77 78 79 80 81 82 83 84 85 86 87 88 89 90 91 92 93 94 95 96 (97 98 99 100 101 102)] [3 4 5 6 7 8 9 10 11 12 13 14 15 16 17 18 19 20 21 22 23 24 25 26 27 28 29 30 31 32 33 34 35 36 37 38 39 40 41 42 43 44 45 46 47 48 49 50 51 52 53 54 55 56 57 58 59 60 61 62 63 64 65 66 67 68 69 70 71 72 73 74 75 76 77 78 79 80 81 82 83 84 85 86 87 88 89 90 91 92 93 94 95 96 (97 98 99 100 101 102)] [4 5 6 7 8 9 10 11 12 13 14 15 16 17 18 19 20 21 22 23 24 25 26 27 28 29 30 31 32 33 34 35 36 37 38 39 40 41 42 43 44 45 46 47 48 49 50 51 52 53 54 55 56 57 58 59 60 61 62 63 64 65 66 67 68 69 70 71 72 73 74 75 76 77 78 79 80 81 82 83 84 85 86 87 88 89 90 91 92 93 94 95 96 (97 98 99 100 101 102)] [5 6 7 8 9 10 11 12 13 14 15 16 17 18 19 20 21 22 23 24 25 26 27 28 29 30 31 32 33 34 35 36 37 38 39 40 41 42 43 44 45 46 47 48 49 50 51 52 53 54 55 56 57 58 59 60 61 62 63 64 65 66 67 68 69 70 71 72 73 74 75 76 77 78 79 80 81 82 83 84 85 86 87 88 89 90 91 92 93 94 95 96 (97 98 99 100 101 102)] [6 7 8 9 10 11 12 13 14 15 16 17 18 19 20 21 22 23 24 25 26 27 28 29 30 31 32 33 34 35 36 37 38 39 40 41 42 43 44 45 46 47 48 49 50 51 52 53 54 55 56 57 58 59 60 61 62 63 64 65 66 67 68 69 70 71 72 73 74 75 76 77 78 79 80 81 82 83 84 85 86 87 88 89 90 91 92 93 94 95 96 (97 98 99 100 101 102)] [7 8 9 10 11 12 13 14 15 16 17 18 19 20 21 22 23 24 25 26 27 28 29 30 31 32 33 34 35 36 37 38 39 40 41 42 43 44 45 46 47 48 49 50 51 52 53 54 55 56 57 58 59 60 61 62 63 64 65 66 67 68 69 70 71 72 73 74 75 76 77 78 79 80 81 82 83 84 85 86 87 88 89 90 91 92 93 94 95 96 (97 98 99 100 101 102)] [8 9 10 11 12 13 14 15 16 17 18 19 20 21 22 23 24 25 26 27 28 29 30 31 32 33 34 35 36 37 38 39 40 41 42 43 44 45 46 47 48 49 50 51 52 53 54 55 56 57 58 59 60 61 62 63 64 65 66 67 68 69 70 71 72 73 74 75 76 77 78 79 80 81 82 83 84 85 86 87 88 89 90 91 92 93 94 95 96 (97 98 99 100 101 102)] [8 9 10 11 12 13 14 15 16 17 18 19 20 21 (97 98 99 100 101 102)] [8 9 (97 98 99 100 101 102)] [11 12 13 14 15 16 17 18 19 20 21 (97 98 99 100 101 102)] [11 12 13 14 (97 98 99 100 101 102)] [11 12 (97 98 99 100 101 102)] [13 14 (97 98 99 100 101 102)] [15 16 17 18 19 20 21 (97 98 99 100 101 102)] [15 17 18 19 20 21 (97 98 99 100 101 102)] [18 19 20 21 (97 98 99 100 101 102)] [18 21 (97 98 99 100 101 102)] [19 20 (97 98 99 100 101 102)] [22 23 24 25 26 27 28 29 30 31 32 33 34 35 36 37 38 39 40 41 42 43 44 45 46 47 48 49 50 51 52 53 54 55 56 57 58 59 60 61 62 63 64 65 66 67 68 69 70 71 72 73 74 75 76 77 78 79 80 81 82 83 84 85 86 87 88 89 90 91 92 93 94 95 96 (97 98 99 100 101 102)] [23 24 25 26 27 28 29 30 31 32 33 34 35 36 37 38 39 40 41 42 43 44 45 46 47 48 49 50 51 52 53 54 55 56 57 58 59 60 61 62 63 64 65 66 67 68 69 70 71 72 73 74 75 76 77 78 79 80 81 82 83 84 85 86 87 88 89 90 91 92 93 94 95 96 (97 98 99 100 101 102)] [23 24 25 26 27 28 29 30 31 32 33 34 35 36 (97 98 99 100 101 102)] [23 24 (97 98 99 100 101 102)] [25 26 27 28 29 30 31 32 33 34 35 36 (97 98 99 100 101 102)][26 27 28 29 30 31 32 33 34 35 36 (97 98 99 100 101 102)][26 27 28 29 30 31 32 (97 98 99 100 101 102)][27 28 29 30 31 32 (97 98 99 100 101 102)][27 28 29 (97 98 99 100 101 102)] [28 29 (97 98 99 100 101 102)] [30 31 32 (97 98 99 100 101 102)] [31 32 (97 98 99 100 101 102)] [33 34 35 36 (97 98 99 100 101 102)] [33 34 (97 98 99 100 101 102)] [35 36 (97 98 99 100 101 102)] [37 38 39 40 41 42 43 44 45 46 47 48 49 50 51 52 53 54 55 56 57 58 59 60 61 62 63 64 65 66 67 68 69 70 71 72 73 74 75 76 77 78 79 80 81 82 83 84 85 86 87 88 89 90 91 92 93 94 95 96 (97 98 99 100 101 102)] [37 38 39 40 41 42 43 44 45 46 47 48 49 (97 98 99 100 101 102)] [37 38 (97 98 99 100 101 102)] [39 40 41 42 43 44 45 46 47 48 49 (97 98 99 100 101 102)] [40 41 42 43 44 45 46 47 48 49 (97 98 99 100 101 102)] [40 41 42 43 44 (97 98 99 100 101 102)] [41 42 43 44 (97 98 99 100 101 102)] [41 42 (97 98 99 100 101 102)] [45 46 47 48 49 (97 98 99 100 101 102)] [46 47 48 49 (97 98 99 100 101 102)] [47 48 49 (97 98 99 100 101 102)] [48 49 (97 98 99 100 101 102)] [50 51 52 53 54 55 56 57 58 59 60 61 62 63 64 65 66 67 68 69 70 71 72 73 74 75 76 77 78 79 80 81 82 83 84 85 86 87 88 89 90 91 92 93 94 95 96 (97 98 99 100 101 102)] [51 52 53 54 55 56 57 58 59 60 61 62 63 64 65 66 67 68 69 70 71 72 73 74 75 76 77 78 79 80 81 82 83 84 85 86 87 88 89 90 91 92 93 94 95 96 (97 98 99 100 101 102)] [51 52 53 54 55 56 57 (97 98 99 100 101 102)] [52 53 54 55 56 57 (97 98 99 100 101 102)] [53 54 55 56 57 (97 98 99 100 101 102)] [54 55 56 57 (97 98 99 100 101 102)] [55 56 57 (97 98 99 100 101 102)] [56 57 (97 98 99 100 101 102)] [58 59 60 61 62 63 64 65 66 67 68 69 70 71 72 73 74 75 76 77 78 79 80 81 82 83 84 85 86 87 88 89 90 91 92 93 94 95 96 (97 98 99 100 101 102)] [58 59 60 (97 98 99 100 101 102)] [58 60 (97 98 99 100 101 102)] [61 62 63 64 65 66 67 68 69 70 71 72 73 74 75 76 77 78 79 80 81 82 83 84 85 86 87 88 89 90 91 92 93 94 95 96 (97 98 99 100 101 102)] [62 63 64 65 66 (97 98 99 100 101 102)] [63 64 65 66 (97 98 99 100 101 102)] [63 65 66 (97 98 99 100 101 102)] [65 66 (97 98 99 100 101 102)] [67 68 69 70 71 72 73 74 75 76 77 78 79 80 81 82 83 84 85 86 87 88 89 90 91 92 93 94 95 96 (97 98 99 100 101 102)] [67 68 69 (97 98 99 100 101 102)] [68 69 (97 98 99 100 101 102)] [70 71 72 73 74 75 76 77 78 79 80 81 82 83 84 85 86 87 88 89 90 91 92 93 94 95 96 (97 98 99 100 101 102)] [70 71 72 73 (97 98 99 100 101 102)] [70 72 73 (97 98 99 100 101 102)] [70 73 (97 98 99 100 101 102)] [74 75 76 77 78 79 80 81 82 83 84 85 86 87 88 89 90 91 92 93 94 95 96 (97 98 99 100 101 102)] [74 75 76 77 (97 98 99 100 101 102)] [75 76 77 (97 98 99 100 101 102)] [76 77 (97 98 99 100 101 102)] [78 79 80 81 82 83 84 85 86 87 88 89 90 91 92 93 94 95 96 (97 98 99 100 101 102)] [78 79 80 81 82 83 84 85 86 87 88 (97 98 99 100 101 102)] [79 80 81 82 83 84 85 86 87 88 (97 98 99 100 101 102)] [80 81 82 83 84 85 86 87 88 (97 98 99 100 101 102)] [80 81 (97 98 99 100 101 102)] [82 83 84 85 86 87 88 (97 98 99 100 101 102)] [82 83 (97 98 99 100 101 102)] [84 85 86 87 88 (97 98 99 100 101 102)] [84 86 87 88 (97 98 99 100 101 102)] [86 87 (97 98 99 100 101 102)] [84 88 (97 98 99 100 101 102)] [89 90 91 92 93 94 95 96 (97 98 99 100 101 102)] [89 90 (97 98 99 100 101 102)] [91 92 93 94 (97 98 99 100 101 102)] [92 93 94 (97 98 99 100 101 102)] [93 94 (97 98 99 100 101 102)] [95 96 (97 98 99 100 101 102)];

proc /;

comments 0

;

## Datasets used in the Discriminant Analysis (DFA)

The Excel and .dat (Past3) files are downloadable at <https://drive.google.com/drive/folders/1BgC97GEJQs6mI6Tf8OIUFZdolKHe6LsR?usp=sharing> and can be obtained by request to Christophe Hendrickx ([christophendrickx@gmail.com](mailto:christophendrickx@gmail.com)).

## Results of the Discriminant Analysis (DFA)

The DFA performed on the whole dataset recovers NMS G.2018.17.1 and GLAHM 125390a outside the morphospace occupied by other theropods. The two isolated teeth are both assigned to the abelisaurid *Rugops* at the taxon-level (Axes 1 and 2 account for 38.98% and 21.36% of the total variance, respectively) and to neovenatorid and troodontid theropods, respectively, at the group-level (Axes 1 and 2 account for 51.51% and 19.72% of the total variance, respectively; Table 1). The reclassification rate (RR) of this analysis is low, given that it correctly discriminates ~62.5% of the teeth to their respective taxon/group. A slightly better RR is seen at the group-level (63.4%) when the absence of denticles is considered as inapplicable; yet, unlike GLAHM 125390a, NMS G.2018.17.1, is still recovered outside the morphospace occupied by other theropods. In this analysis, both are classified as Troodontidae at the group-level (Axis 1 50.31%, Axis 2 19.14%), and as the abelisaurids *Rugops* and *Majungasaurus* at the taxon-level, respectively (Table 1).

The DFAs of our personal dataset yield relatively similar results and slightly lower RR than those of the whole dataset (59.27−61.82%). NMS G.2018.17.1 remains outside the morphospace occupied by other theropod taxa whereas GLAHM 125390a is retrieved within the morphospace occupation of non-abelisaurid ceratosaurs and non-spinosaurid megalosauroids (Figure 3). Both are assigned to the same groups as in previous analyses (Neovenatoridae and Troodontidae, respectively). NMS G.2018.17.1 and GLAHM 125390a were assigned to the same groups as in the previous analyses (Neovenatoridae and Troodontidae, respectively), with NMS G.2018.17.1 being also classified as a non-abelisauroid ceratosaur when absence of denticles was treated as in applicable (Table 1). Unlike the previous analysis, NMS G.2018.17.1 was referred to *Megaraptor* or *Arcovenator*, and GLAHM 125390a to *Megaraptor* or *Majungasaurus*, depending on whether denticles were included or treated as inapplicable.

Much higher RRs (73.73−86.57%) were obtained when performing the DFA on the datasets of Smith & Lamanna (2006) and Gerke & Wings (2016). Using the Smith & Lamanna (2006) dataset, GLAHM 125390a and NMS G.2018.17.1 were classified as belonging to Ceratosauridae and Carcharodontosauridae, respectively, at the group-level (Axis 1 55.77%, Axis 2 33.54%), and to *Ceratosaurus* and *Dilophosaurus*, respectively, at the taxon-level (Axis 1 70.07%, Axis 2 14.55%), when CA2 and DAVG2 are considered in the analysis (RR of 78.49%). Excluding these variables yielded different results, with NMS G.2018.17.1 and GLAHM 125390a assigned to Ceratosauridae/*Carcharodontosaurus* and Carcharodontosauridae/*Suchomimus* at the group/taxon level, respectively (Axis 1 56.29%, Axis 2 33.99% / Axis 1 71.27%, Axis 2 14.47%; Table 1). However, NMS G.2018.17.1 and GLAHM 125390a were referred to Ceratosauridae and Neovenatoridae at the group-level (RR of 73.73%; Axis 1 51.46%, Axis 2 38.12%) and to *Carcharodontosaurus* and *Neovenator* at the taxon-level (86.57%; Axis 1 64.14%, Axis 2 24.42%), respectively, in the DFA of the Gerke & Wings (2016) dataset, in which CHR is considered instead of CBL. Excluding ratio variables from the dataset and considering CBL yields slightly different results, with NMS G.2018.17.1 assigned to Metriacanthosauridae.

When only large teeth are considered, and datasets restricted to taxa with teeth larger than two centimetres (whole dataset and personal dataset), NMS G.2018.17.1 is repeatedly found outside the morphospace of other theropod taxa (i.e., the whole dataset and our personal dataset). RR remains low in these analyses and varies between 59.47% and 63.43% at the group-level, and between 58.4% and 61.87% at the taxon-level (Table 1). Consistently, the specimen is classified as a non-abelisauroid Ceratosauria, and assigned to the megalosaurid *Torvosaurus* and the abelisaurid *Arcovenator* at the taxon-level, dependent on whether denticles are considered relevant or treated as inapplicable.

## Credits of the theropod silhouettes illustrating figures 2 and 3

- *Herrerasaurus*/Non-neotheropod Saurischia, *Eoraptor*, *Coelophysis*, *Ceratosaurus*/Non-abelisauroid Ceratosauria, *Masiakasaurus*/Noasauridae, *Aucasaurus*/*Carnotaurus*/Abelisauridae, *Marshosaurus*/Non-megalosauran Megalosauroidea, *Torvosaurus*/Megalosauridae, *Baryonyx*/Spinosauridae, *Allosaurus*/Metriacanthosauridae + Allosauridae, *Neovenator*, *Acrocanthosaurus*, *Giganotosaurus*/Carcharodontosauridae, *Guanlong*, *Eotyrannus*/Non-tyrannosaurid Tyrannosauroidea, *Tyrannosaurus*/Tyrannosauridae, *Ornitholestes*/Basalmost Coelurosauria, *Compsognathus*/Compsognathidae, *Oviraptor*/Oviraptorosauria (Fig. 2), *Velociraptor*, *Troodon*/Troodontidae, *Archaeopteryx*: Scott Hartman (Phylopic; <https://creativecommons.org/licenses/by-sa/3.0/>).
- *Daemonosaurus*: © Smithsonian Institution (modified)
- *Dilophosaurus*/Non-averostran Neotheropoda: Julio Garza (Phylopic; <https://creativecommons.org/licenses/by-sa/3.0/>).
- *Yangchuanosaurus* (as Metriacanthosauridae): Gregory S. Paul (used with permission)
- *Australovenator*: T. Tischler (Phylopic; <https://creativecommons.org/licenses/by-sa/3.0/>).
- *Pelecanimimus*/Ornithomimosauria: Nobu Tamura (Phylopic; <https://creativecommons.org/licenses/by-nc/3.0/>).
- *Shuvuuia*/Alvarezsauroidea, *Dromaeosauroides*: FunkMonk (Phylopic; <https://creativecommons.org/publicdomain/zero/1.0/>).
- *Therizinosaurus*: Martin Kevil (Phylopic; <https://creativecommons.org/licenses/by-nc/3.0/>).
- *Similicaudipteryx*/Oviraptorosauria (Fig. 3): Matt Martyniuk (Phylopic; <https://creativecommons.org/licenses/by-nc/3.0/>).
- *Rahonavis*: T. Michael Keesey (Phylopic; <https://creativecommons.org/publicdomain/zero/1.0/>).
- *Microraptor* /Microraptorinae, *Utahraptor*/Dromaeosauridae/Dromaeosaurinae: Emily Willoughby (Phylopic; <https://creativecommons.org/licenses/by-nc/3.0/>).

## Acknowledged curators

Christophe Hendrickx acknowledge the following curators and palaeontologists for access to the dental material of theropods and the help provided during the visit of their collections: Simão Mateus (ML), Louis Jacobs (SMU), Dale Winkler (SMU), Anthony Fiorillo (DMNH), Ronald Tykoski (DMNH), Paul Sereno (Uni. Chicago), Peter Makovicky (FMNH), William Simpson (FMNH), Matthew Lamanna (CMNH), Amy Henrici (CMNH), Matthew Carrano (USNM), Michael Brett-Surman (USNM), Amanda Millhouse (USNM), Sandra Chapman (NHMUK), Paul Barrett (NHMUK), Paul Jeffery (OUMNH), Stephen Hutt (MIW), Ronan Allain (MNHN), Rainer Schoch (SMNS), Hans-Jacob Siber (SMA), Christiano Dal Sasso (MSNM), Alejandro Kramarz (MACN), Fernando Novas (MACN), Marcello Reguero (MLP), Ruben Barbieri (MPCA), Leonardo Salgado (MUCPv-CH), Juan Ignacio Canale (MUCPv-CH), Rodolfo Coria (MCF-PVPH), Cecilia Succar (MCF-PVPH), Jorge Calvo (CePaLB), Juan Porfiri (UNDC), Ricardo Martínez (PVSJ), Carl Mehling (AMNH), Mark Norell (AMNH), David Krauze (SBU), Joseph Groenke (SBU), Paul Brinkman (NCSM), Lindsay Zanno (NCSM), Jorge Sequeira (LNEG), Fareed Krupp (QMA), Khalid Hassan Al-Jaber (QMA), Sanker S.B (QMA), Yves Dutour (MHNA), Thierry Tortosa (MHNA), Jaime Powell (PVL), Pablo Ortiz (PVL), Rodrigo Gonzalez (PVL), Bernard Zipfel (ESI) and Sifelani Jirah (ESI), Xu Xing (IVPP), Zheng Fang (IVPP), Corwin Sullivan (IVPP), Li Feng (IVPP), Lizhao Zhang (IVPP), Jingmai O’Connor (IVPP), Annelise Folie (IRSNB), Pascal Godefroit (IRSNB), Oliver Rauhut (BSPG), Gertrud Rößner (BSPG), Femke Holwerda (BSPG), Martina Kölbl-Ebert (JME), Brooks Britt (BYU), Carrie Levitt-Bussian (UMNH) Randall B. Irmis (UMNH), Joe Sertich (DMNS), Logan Ivy (DMNS), Brandon Strilisky (TMP), Becky Sanchez (TMP), Don Brinkman (TMP), Donald Henderson (TMP), and Daniel L. Brinkman (YPM).

## Bibliography of the Appendix

Bakker, R. T., Williams, M. and Currie, P. J. 1988. *Nanotyrannus*, a new genus of pygmy tyrannosaur, from the latest Cretaceous of Montana. *Hunteria* 1 (5): 1–30.

Benson, R. B. J. 2010. A description of *Megalosaurus bucklandii* (Dinosauria: Theropoda) from the Bathonian of the UK and the relationships of Middle Jurassic theropods. *Zoological Journal of the Linnean Society* 158 (4): 882–935.

Brusatte, S. L., Benson, R. B. J., Carr, T. D., Williamson, T. E. and Sereno, P. C. 2007. The systematic utility of theropod enamel wrinkles. *Journal of Vertebrate Paleontology* 27 (4): 1052–1056.

Canale, J. I., Scanferla, C. A., Agnolín, F. L. and Novas, F. E. 2009. New carnivorous dinosaur from the Late Cretaceous of NW Patagonia and the evolution of abelisaurid theropods. *Naturwissenschaften* 96 (3): 409–414.

Carrano, M. T., Sampson, S. D. and Forster, C. A. 2002. The osteology of *Masiakasaurus knopfleri*, a small abelisauroid (Dinosauria: Theropoda) from the Late Cretaceous of Madagascar. *Journal of Vertebrate Paleontology* 22 (3): 510–534.

Charig, A. J. and Milner, A. C. 1997. *Baryonyx walkeri*, a fish-eating dinosaur from the Wealden of Surrey. *Bulletin of the Natural History Museum* 53 (1): 11–70.

Chiappe, L. M., Norell, M. A. and Clark, J. M. 1996. Phylogenetic position of *Mononykus* (Aves: Alvarezsauridae) from the Late Cretaceous of the Gobi Desert. *Memoirs of the Queensland Museum* 39: 557–582.

Choiniere, J. N., Clark, J. M., Forster, C. A. and Xu, X. 2010a. A basal coelurosaur (Dinosauria: Theropoda) from the Late Jurassic (Oxfordian) of the Shishugou Formation in Wucaiwan, People’s Republic of China. *Journal of Vertebrate Paleontology* 30 (6): 1773–1796.

Choiniere, J. N., Xu, X., Clark, J. M., Forster, C. A., Guo, Y. and Han, F. 2010b. A basal alvarezsauroid theropod from the Early Late Jurassic of Xinjiang, China. *Science* 327 (5965): 571–574.

Currie, P. J. 1987. Bird-like characteristics of the jaws and teeth of troodontid theropods (Dinosauria, Saurischia). *Journal of Vertebrate Paleontology* 7 (1): 72–81.

Currie, P. J. 1995. New information on the anatomy and relationships of *Dromaeosaurus albertensis* (Dinosauria: Theropoda). *Journal of Vertebrate Paleontology* 15 (3): 576–591.

Currie, P. J. and Carpenter, K. 2000. A new specimen of *Acrocanthosaurus atokensis* (Theropoda, Dinosauria) from the Lower Cretaceous Antlers Formation (Lower Cretaceous, Aptian) of Oklahoma, USA. *Geodiversitas* 22 (2): 207–246.

Gauthier, J. 1986. Saurischian monophyly and the origin of birds. *In*: Padian, K. (ed.), *The Origin of Birds and the Evolution of Flight*, 1–55. Memoirs of the California Academy of Sciences Number 8, San Francisco, California.

Harris, J. D. 1998. A reanalysis of *Acrocanthosaurus atokensis*, its phylogenetic status, and paleobiogeographic implications, based on a new specimen from Texas. *New Mexico Museum of Natural History and Science Bulletin* 13: 1–75.

Holtz, T. R. J. 1998. A new phylogeny of the carnivorous dinosaurs. *Gaia* 15: 5–61.

Holtz, T. R. J. 2001. The phylogeny and taxonomy of the Tyrannosauridae. *In*: Tanke, D. H., Carpenter, K. and Skrepnick, M. W. (eds.), *Mesozoic Vertebrate Life*, 64–83. Indiana University Press, Bloomington, Indiana.

Holtz, T. R. J., Molnar, R. E. and Currie, P. J. 2004. Basal Tetanurae. *In*: Weishampel, D. B., Dodson, P. and Osmólska, H. (eds.), *The Dinosauria. Second Edition*, 71–110. University of California Press, Berkeley, California.

Hwang, S. H. 2007. Phylogenetic patterns of enamel microstructure in dinosaur teeth. Ph.D. Dissertation, Columbia University, New York, New York., 274pp.

Martin, L. D., Stewart, J. D. and Whetstone, K. N. 1980. The origin of birds: structure of the tarsus and teeth. *The Auk* 97: 86–93.

Mateus, O., Araújo, R., Natário, C. and Castanhinha, R. 2011. A new specimen of the theropod dinosaur *Baryonyx* from the early Cretaceous of Portugal and taxonomic validity of *Suchosaurus*. *Zootaxa* 2827: 54–68.

Norell, M. A., Clark, J. M. and Makovicky, P. J. 2001. Phylogenetic relationships among coelurosaurian theropods. *Gauthier and Gall*: 49–67.

Peyer, K. 2006. A reconsideration of *Compsognathus* from the upper Tithonian of Canjuers, southeastern France. *Journal of Vertebrate Paleontology* 26 (4): 879–896.

Rauhut, O. W. M. 2003. The interrelationships and evolution of basal theropod dinosaurs. *Special Papers in Palaeontology* 69: 1–213.

Rauhut, O. W. M. and Werner, C. 1995. First record of the family Dromaeosauridae (Dinosauria: Theropoda) in the Cretaceous of Gondwana (Wadi Milk Formation, northern Sudan). *Paläontologische Zeitschrift* 69 (3): 475–489.

Rowe, T. 1989. A new species of the theropod dinosaur *Syntarsus* from the Early Jurassic Kayenta Formation of Arizona. *Journal of Vertebrate Paleontology* 9 (2): 125–136.

Rowe, T. and Gauthier, J. 1990. Ceratosauria. *In*: Weishampel, D., Dodson, P. and Osmólska, H. (eds.), *The Dinosauria. First Edition*, 151–168. University of California Press, Berkeley, California.

Russell, D. A. and Dong, Z. M. 1993. The affinities of a new theropod from the Alxa Desert, Inner Mongolia, People’s Republic of China. *Canadian Journal of Earth Sciences* 30 (10): 2107–2127.

Senter, P., Barsbold, R., Britt, B. B. and Burnham, D. A. 2004. Systematics and evolution of Dromaeosauridae (Dinosauria, Theropoda). *Bulletin of Gunma Museum of Natural History* 8: 1–20.

Sereno, P. C. 1999. The Evolution of Dinosaurs. *Science* 284 (5423): 2137–2147.

Sereno, P. C., Wilson, J. A. and Conrad, J. L. 2004. New dinosaurs link southern landmasses in the Mid–Cretaceous. *Proceedings of the Royal Society of London. Series B: Biological Sciences* 271 (1546): 1325–1330.

Sereno, P. C., Beck, A. L., Dutheil, D. B., Gado, B., Larsson, H. C. E., Lyon, G. H., Marcot, J. D., Rauhut, O. W. M., Sadleir, R. W., Sidor, C. A., Varricchio, D. D., Wilson, G. P. and Wilson, J. A. 1998. A long-snouted predatory dinosaur from Africa and the evolution of spinosaurids. *Science* 282 (5392): 1298–1302.

Smith, J. B. 2007. Dental morphology and variation in *Majungasaurus crenatissimus* (Theropoda: Abelisauridae) from the Late Cretaceous of Madagascar. *Journal of Vertebrate Paleontology* 27 (sup2): 103–126.

Tykoski, R. S. 2005. Anatomy, ontogeny, and phylogeny of coelophysoid theropods. Ph.D. Dissertation, The University of Texas, Austin, Texas, 553pp.

Welles, S. P. 1984. *Dilophosaurus wetherilli* (Dinosauria, Theropoda). Osteology and comparisons. *Palaeontographica Abteilung A* 185 (4–6): 85–180.

Zanno, L. E., Gillette, D. D., Albright, L. B. and Titus, A. L. 2009. A new North American therizinosaurid and the role of herbivory in ‘predatory’ dinosaur evolution. *Proceedings of the Royal Society B: Biological Sciences* 276 (1672): 3505–3511.
